# Supplementary material
Source: PubMed Central journal article supplement (PMC8790611)
Supplement: mmc1.pdf [file mmc1.pdf]

## Supplementary Figure 1: Causes of all-ages DALYs and deaths per 100,000 population in Japan in 2013 and 2019 for women

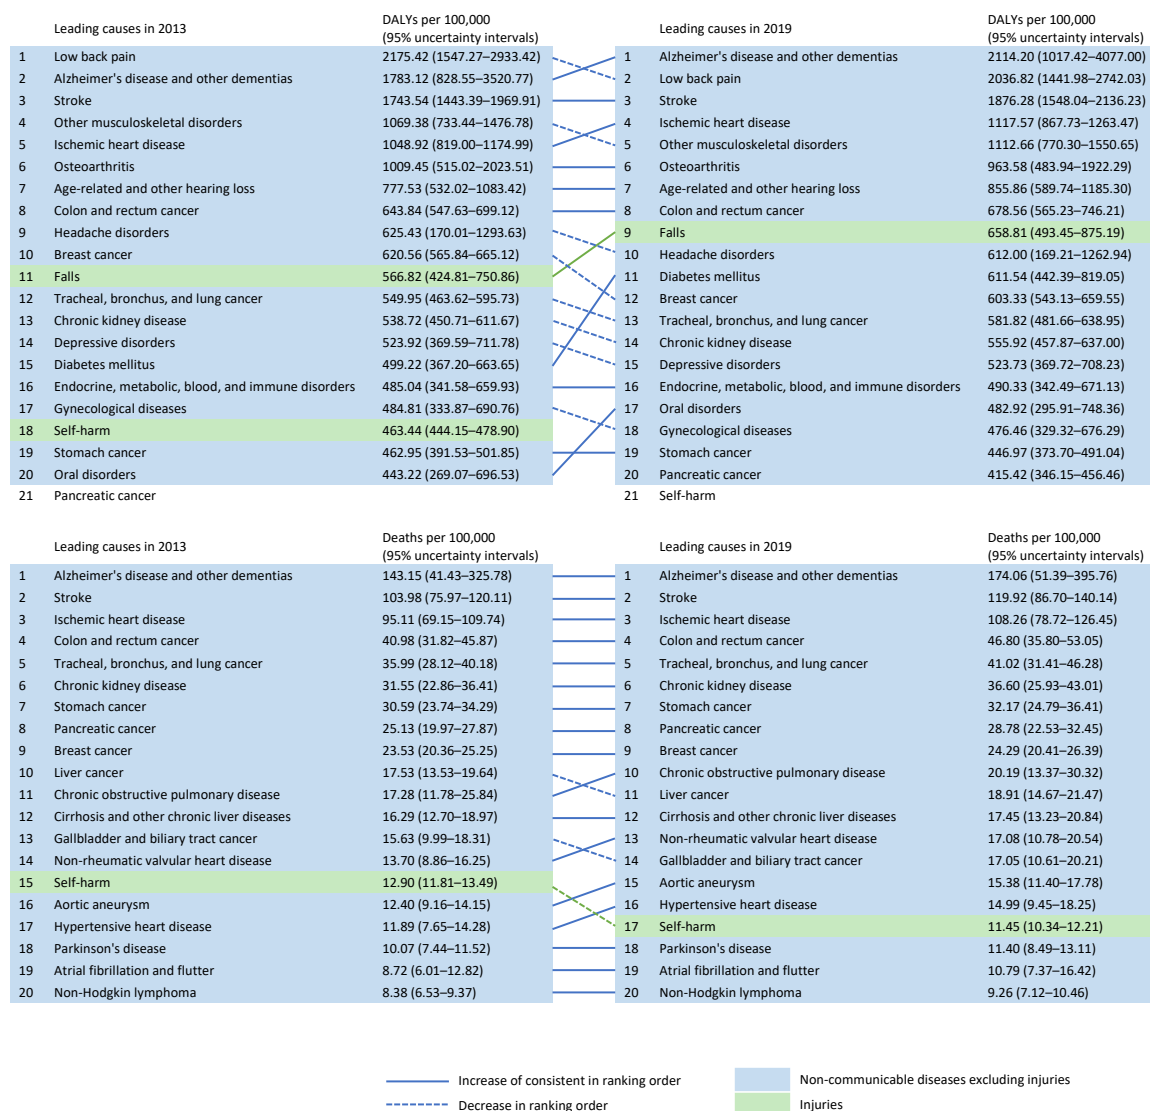

\* Data were obtained from the GBD results tool: <http://ghdx.healthdata.org/gbd-results-tool>.

## Supplementary Figure 2: Causes of all-ages DALYs and deaths per 100,000 population in Japan in 2013 and 2019 for men

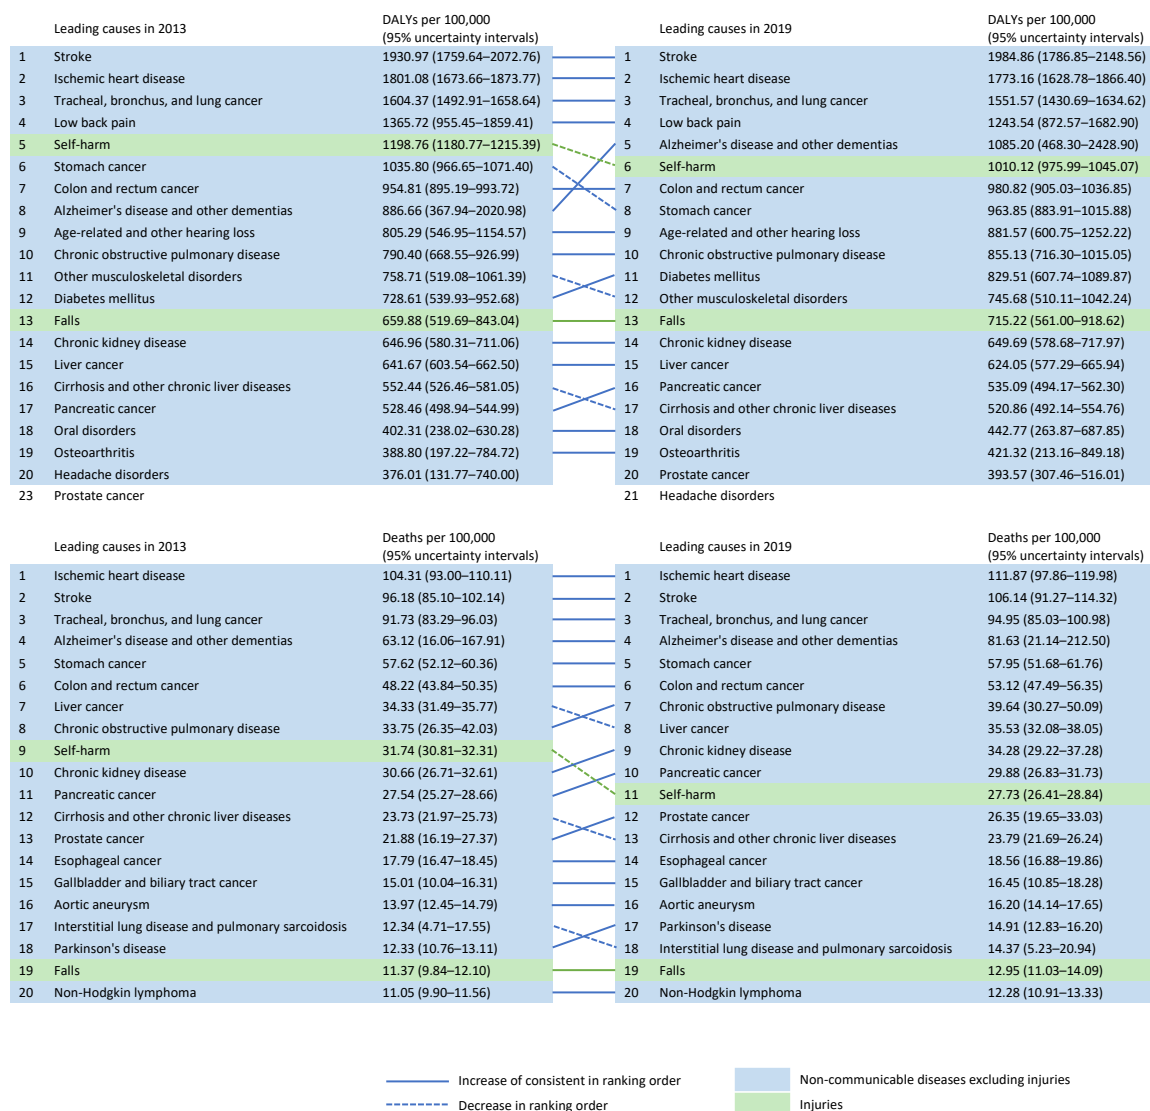

\* Data were obtained from the GBD results tool: <http://ghdx.healthdata.org/gbd-results-tool>.

**Supplementary Figure 3: All-ages DALYs rate (per 100,000 population) attributable to preventable behavioral and metabolic risk factors in 2013 and 2019 for both sexes combined**

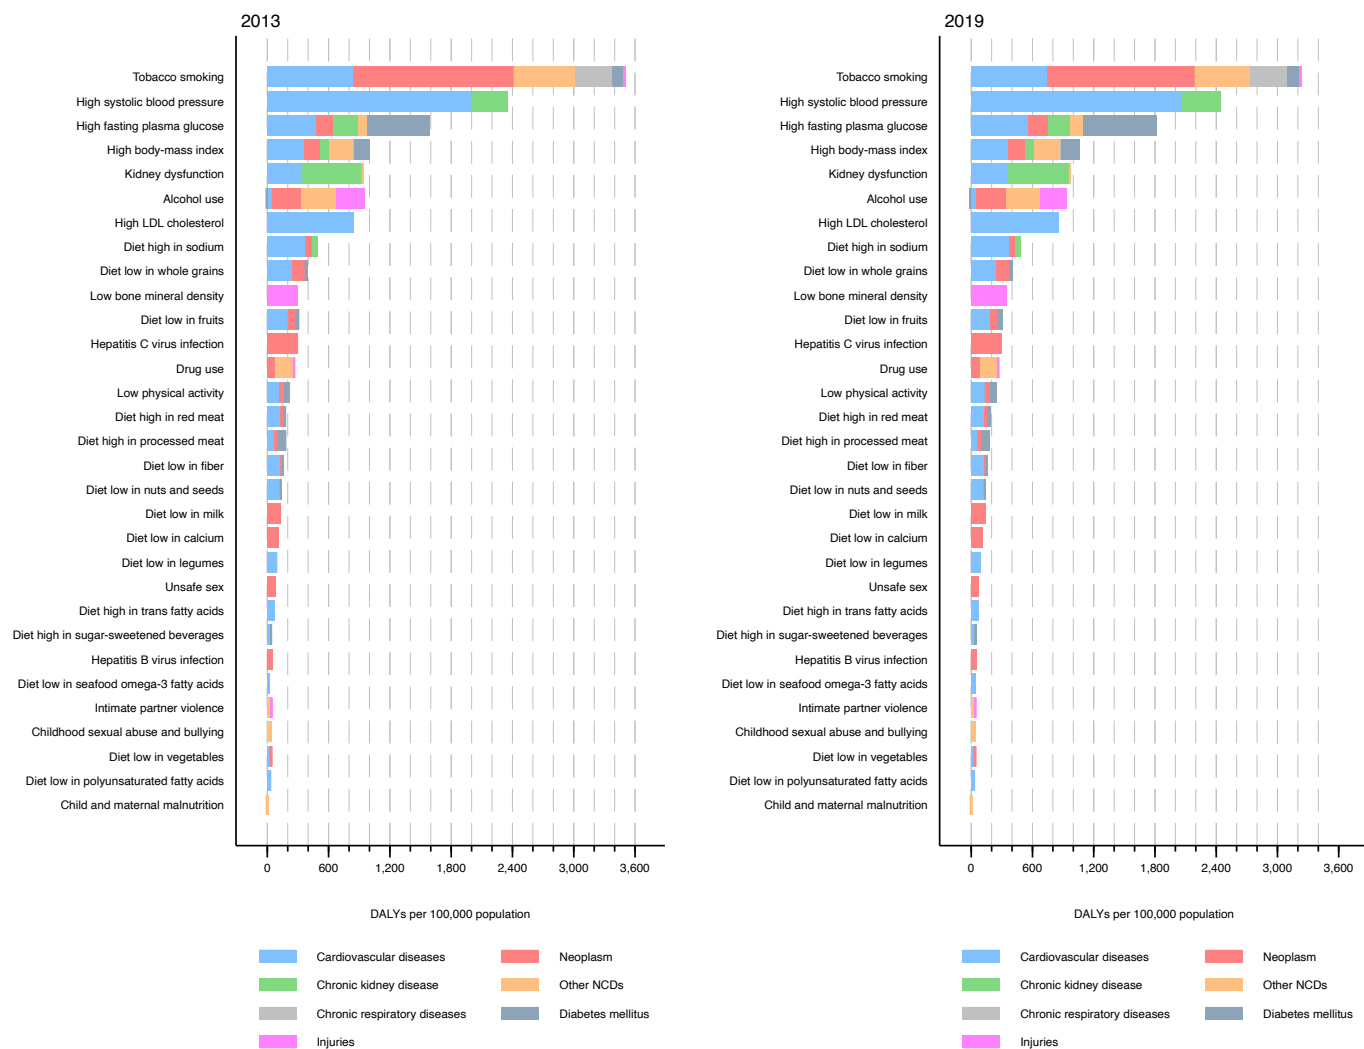

\* Data, except for hepatitis B and C virus infections, were obtained from the GBD results tool: <http://ghdx.healthdata.org/gbd-results-tool>. DALYs: disability-adjusted life years; NCD: non-communicable disease; LDL: low-density lipoprotein. The order of risk factors is sorted by 2019 values.

**Supplementary Figure 4: All-ages mortality rate (per 100,000) attributable to preventable behavioral and metabolic risk factors in 2013 and 2019 for both sexes combined**

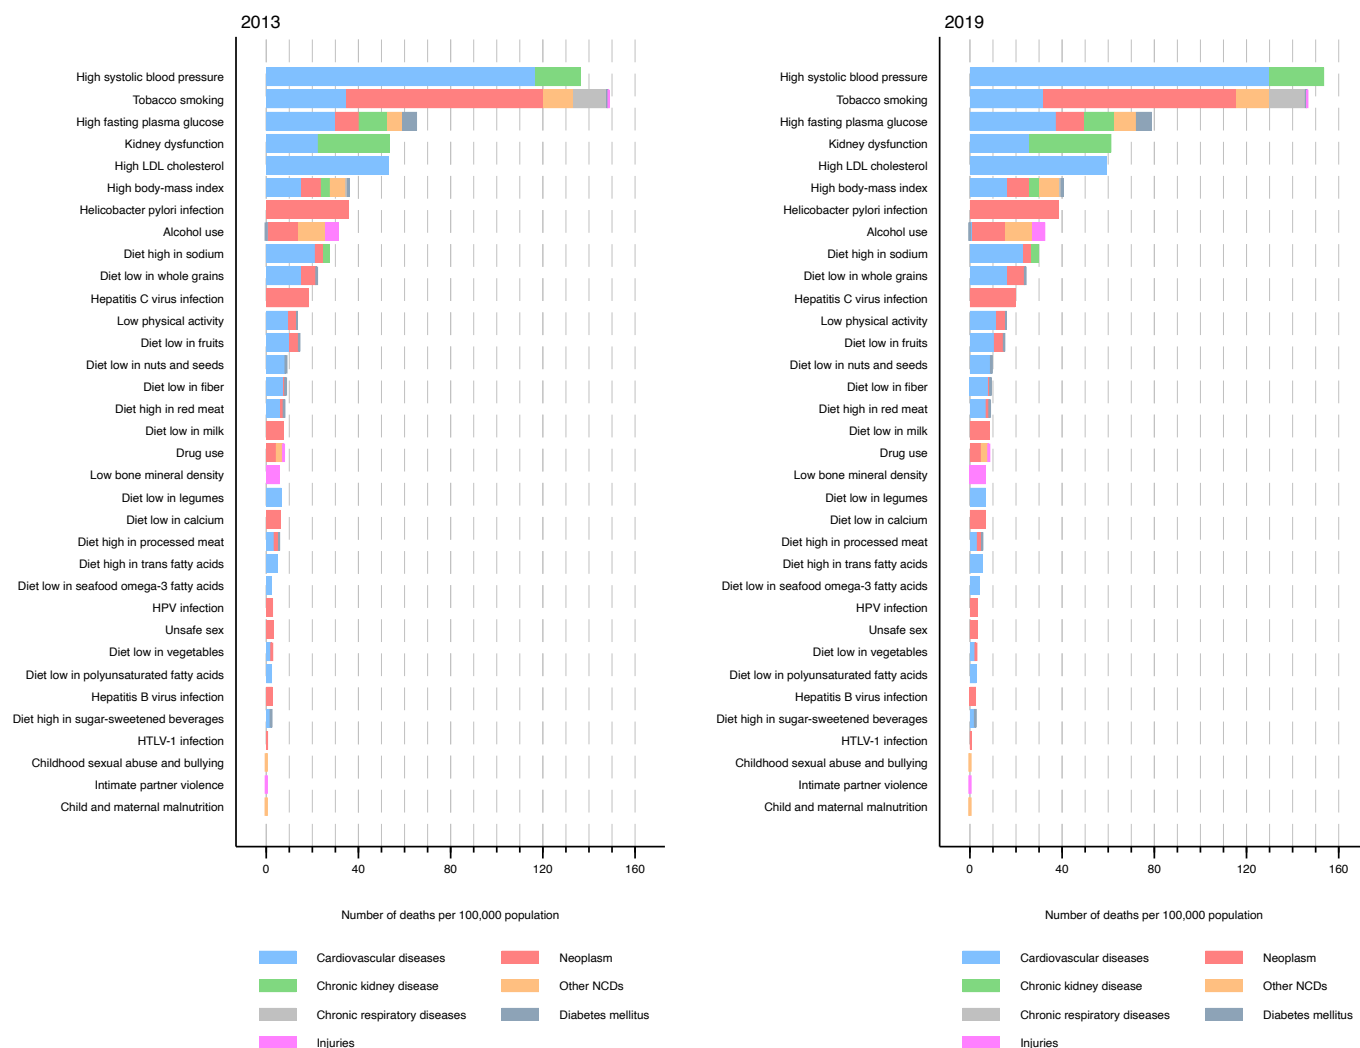

\* Data, except for hepatitis B and C virus infections, *Helicobacter pylori* infection, HPV infection, and HTLV-1 infection, were obtained from the GBD results tool: <http://ghdx.healthdata.org/gbd-results-tool>. NCD: non-communicable disease; LDL: low-density lipoprotein; HPV: human papillomavirus; HTLV-1: human T-cell leukemia virus type 1. The order of risk factors is sorted by 2019 values.

**Supplementary Figure 5: All-ages DALYs attributable to preventable behavioral and metabolic risk factors in 2013 and 2019 for women**

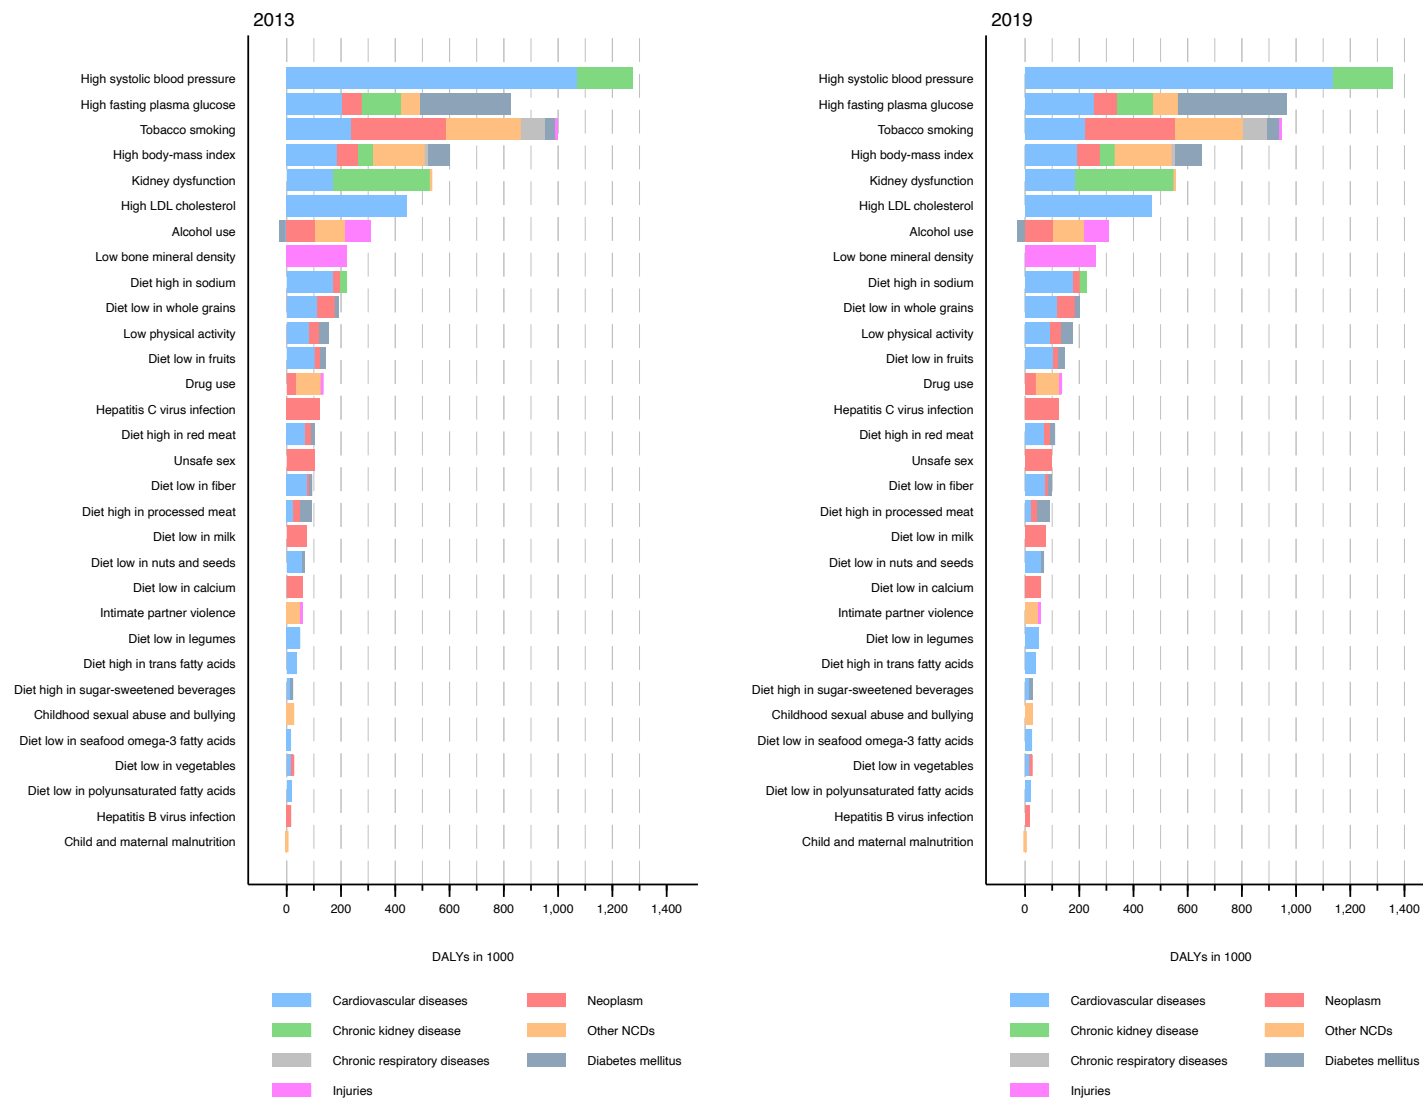

\* Data, except for hepatitis B and C virus infections, were obtained from the GBD results tool: <http://ghdx.healthdata.org/gbd-results-tool>. DALYs: disability-adjusted life years; NCD: non-communicable disease; LDL: low-density lipoprotein. The order of risk factors is sorted by 2019 values.

**Supplementary Figure 6: All-ages number of deaths attributable to preventable behavioral and metabolic risk factors in 2013 and 2019 for women**

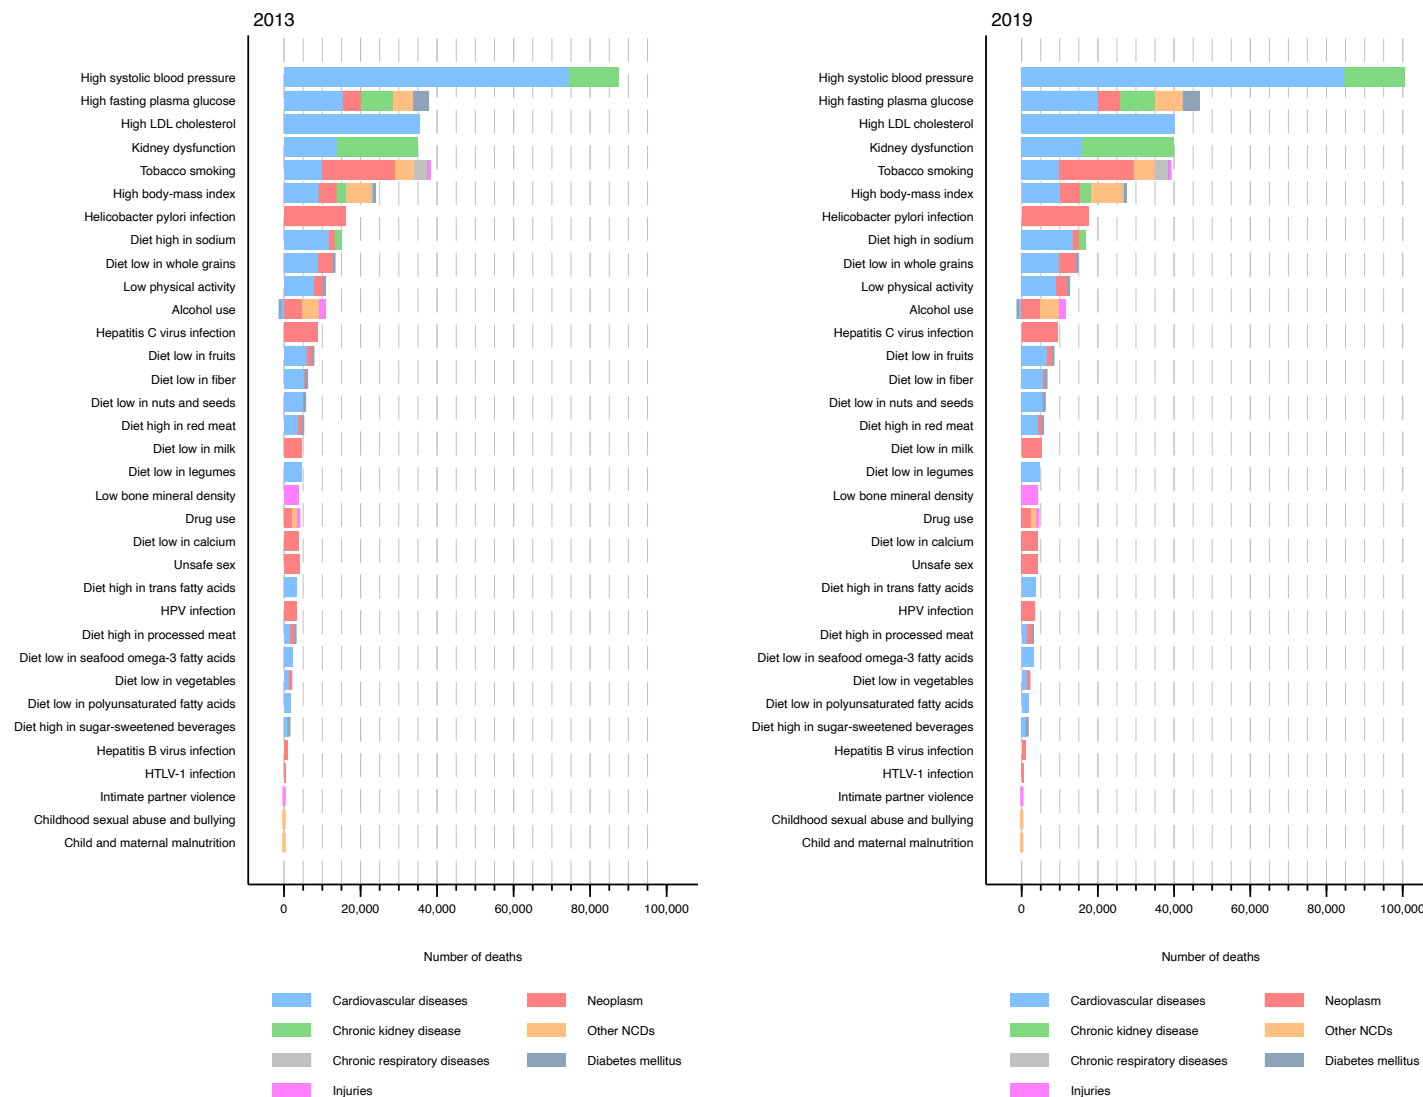

\* Data, except for hepatitis B and C virus infections, *Helicobacter pylori* infection, HPV infection, and HTLV-1 infection, were obtained from the GBD results tool: <http://ghdx.healthdata.org/gbd-results-tool>. NCD: non-communicable disease; LDL: low-density lipoprotein; HPV: human papillomavirus; HTLV-1: human T-cell leukemia virus type 1. The order of risk factors is sorted by 2019 values.

## Supplementary Figure 7: All-ages DALYs rate (per 100,000 population) attributable to preventable behavioral and metabolic risk factors in 2013 and 2019 for women

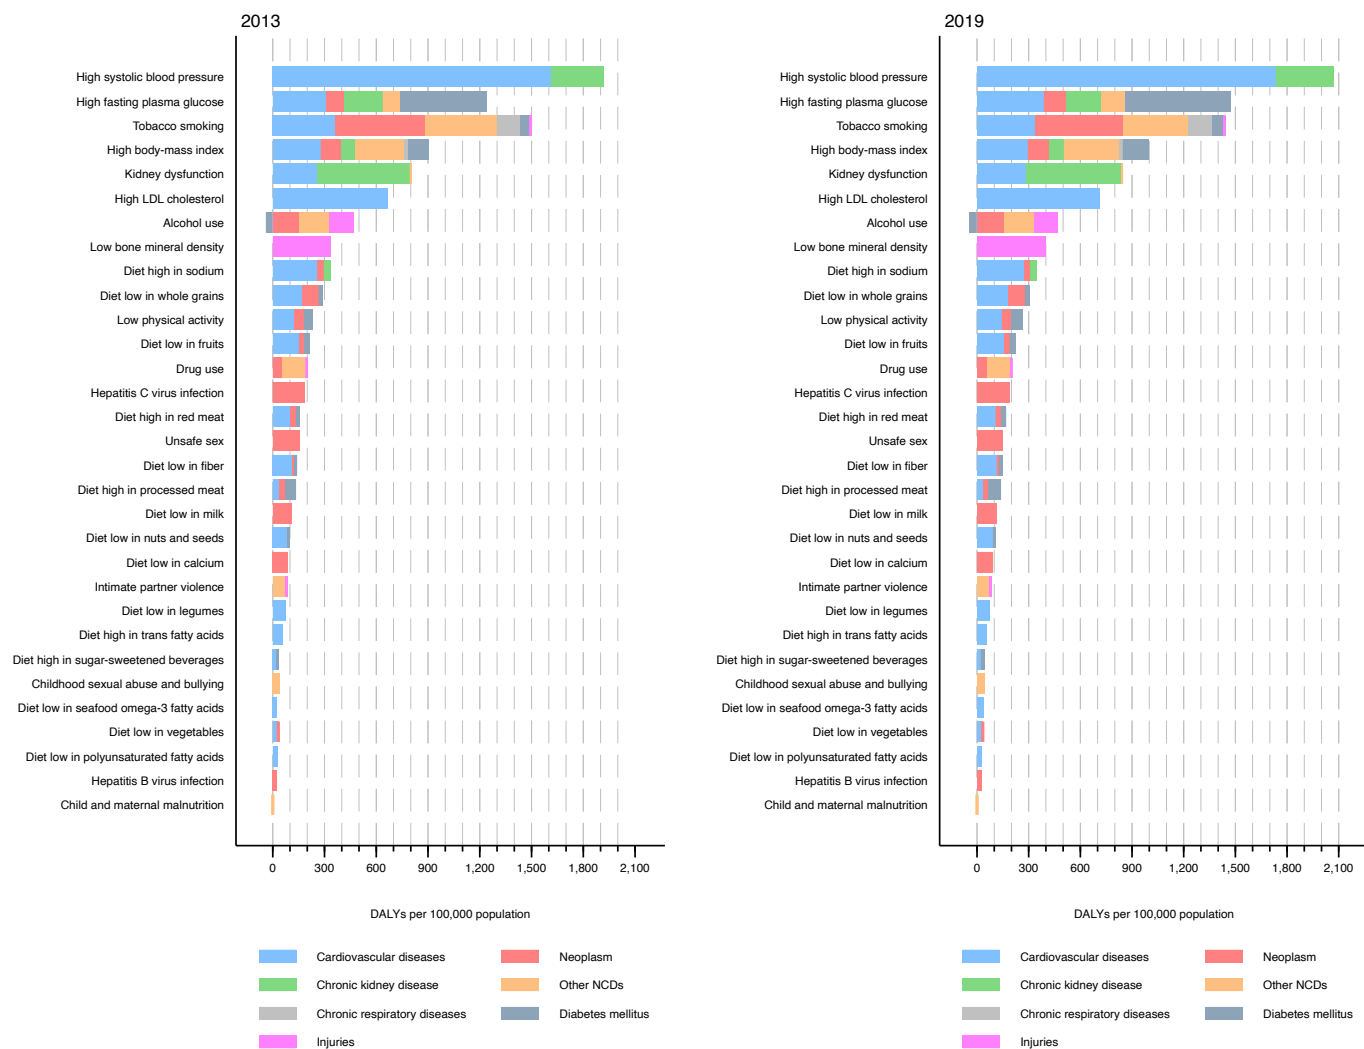

\* Data, except for hepatitis B and C virus infections, were obtained from the GBD results tool: <http://ghdx.healthdata.org/gbd-results-tool>. DALYs: disability-adjusted life years; NCD: non-communicable disease; LDL: low-density lipoprotein. The order of risk factors is sorted by 2019 values.

**Supplementary Figure 8: All-ages mortality rate (per 100,000) attributable to preventable behavioral and metabolic risk factors in 2013 and 2019 for women**

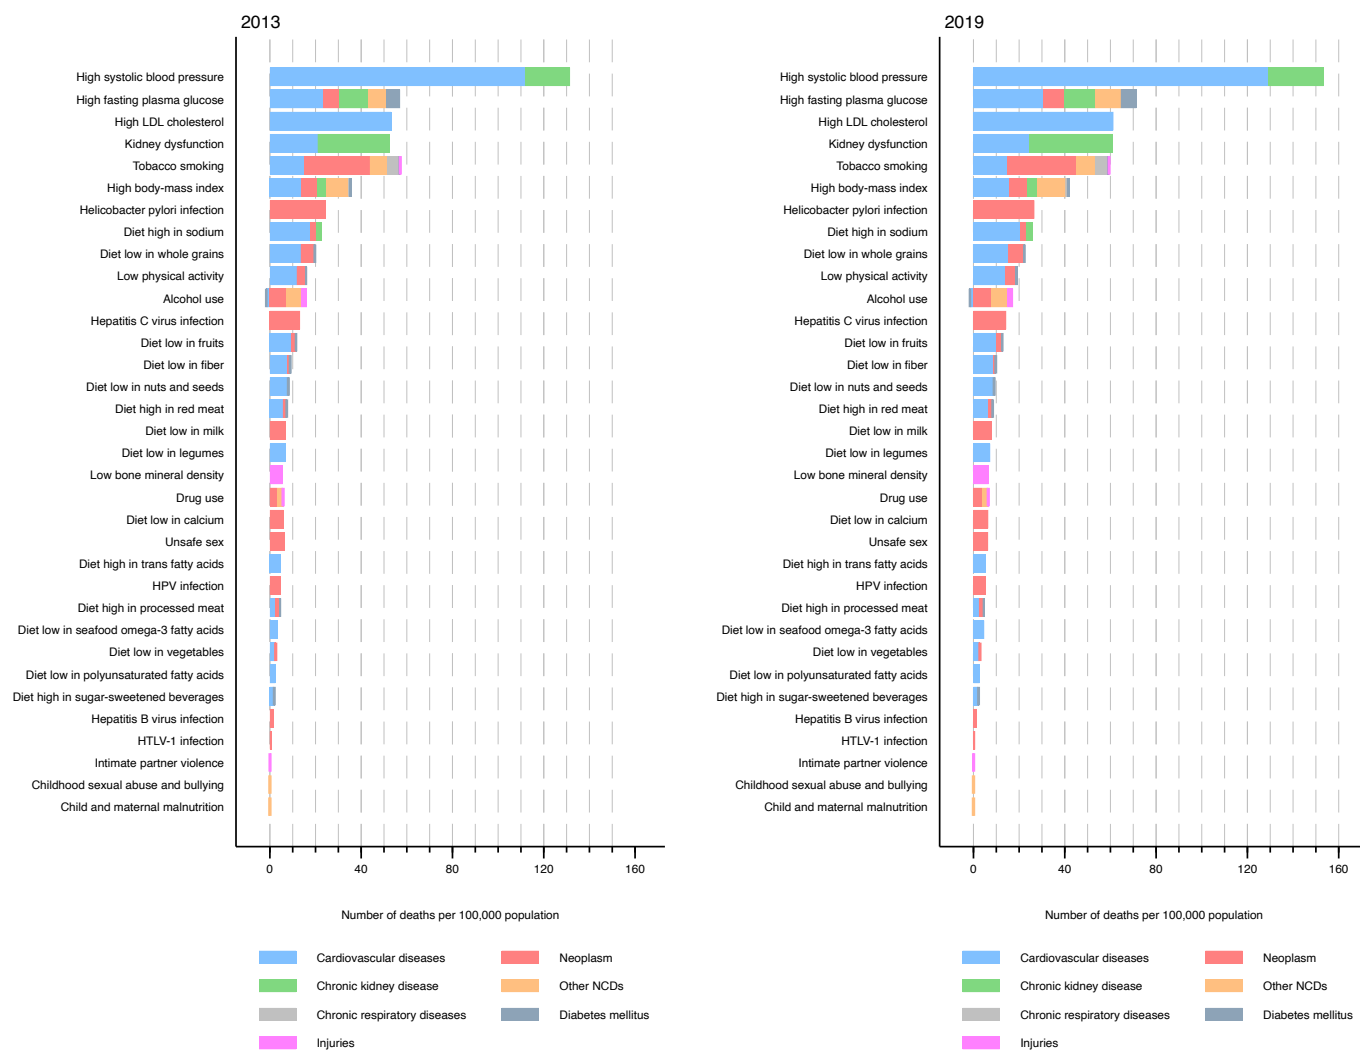

\* Data, except for hepatitis B and C virus infections, *Helicobacter pylori* infection, HPV infection, and HTLV-1 infection, were obtained from the GBD results tool: <http://ghdx.healthdata.org/gbd-results-tool>. NCD: non-communicable disease; LDL: low-density lipoprotein; HPV: human papillomavirus; HTLV-1: human T-cell leukemia virus type 1. The order of risk factors is sorted by 2019 values.



**Supplementary Figure 9: All-ages DALYs attributable to preventable behavioral and metabolic risk factors in 2013 and 2019 for men**

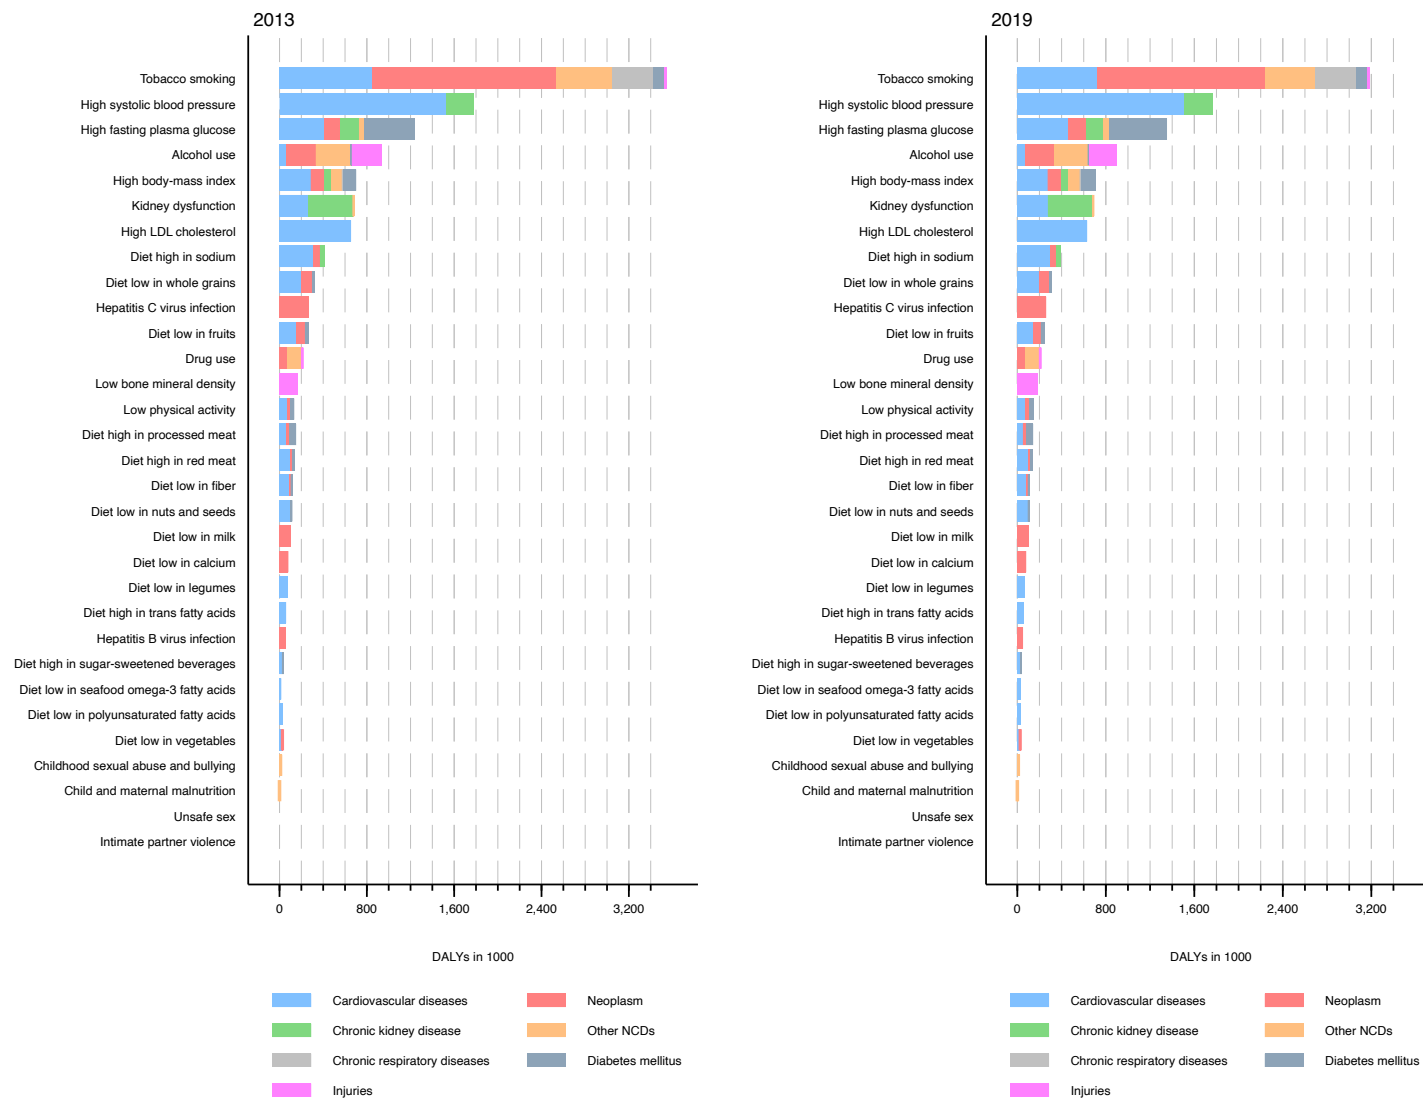

\* Data, except for hepatitis B and C virus infections, were obtained from the GBD results tool: <http://ghdx.healthdata.org/gbd-results-tool>. DALYs: disability-adjusted life years; NCD: non-communicable disease; LDL: low-density lipoprotein. The order of risk factors is sorted by 2019 values.

Supplementary Figure 10: All-ages number of deaths attributable to preventable behavioral and metabolic risk factors in 2013 and 2019 for men

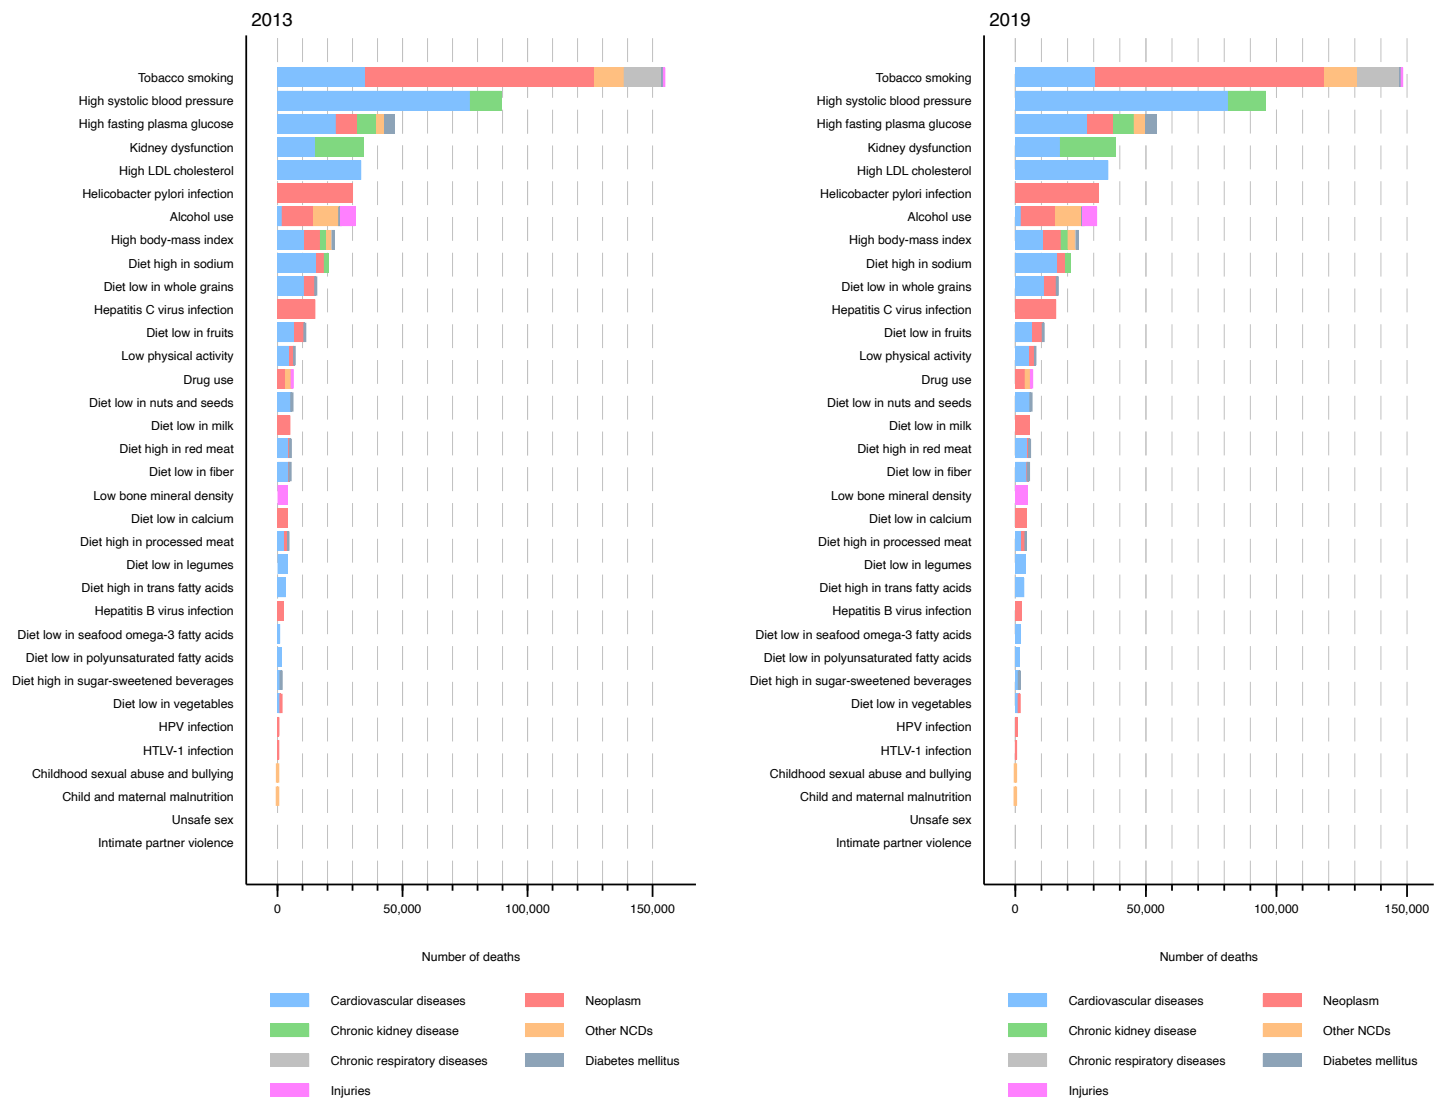

\* Data, except for hepatitis B and C virus infections, *Helicobacter pylori* infection, HPV infection, and HTLV-1 infection, were obtained from the GBD results tool: <http://ghdx.healthdata.org/gbd-results-tool>. NCD: non-communicable disease; LDL: low-density lipoprotein; HPV: human papillomavirus; HTLV-1: human T-cell leukemia virus type 1. The order of risk factors is sorted by 2019 values.

**Supplementary Figure 11: All-ages DALYs rate (per 100,000 population) attributable to preventable behavioral and metabolic risk factors in 2013 and 2019 for men**

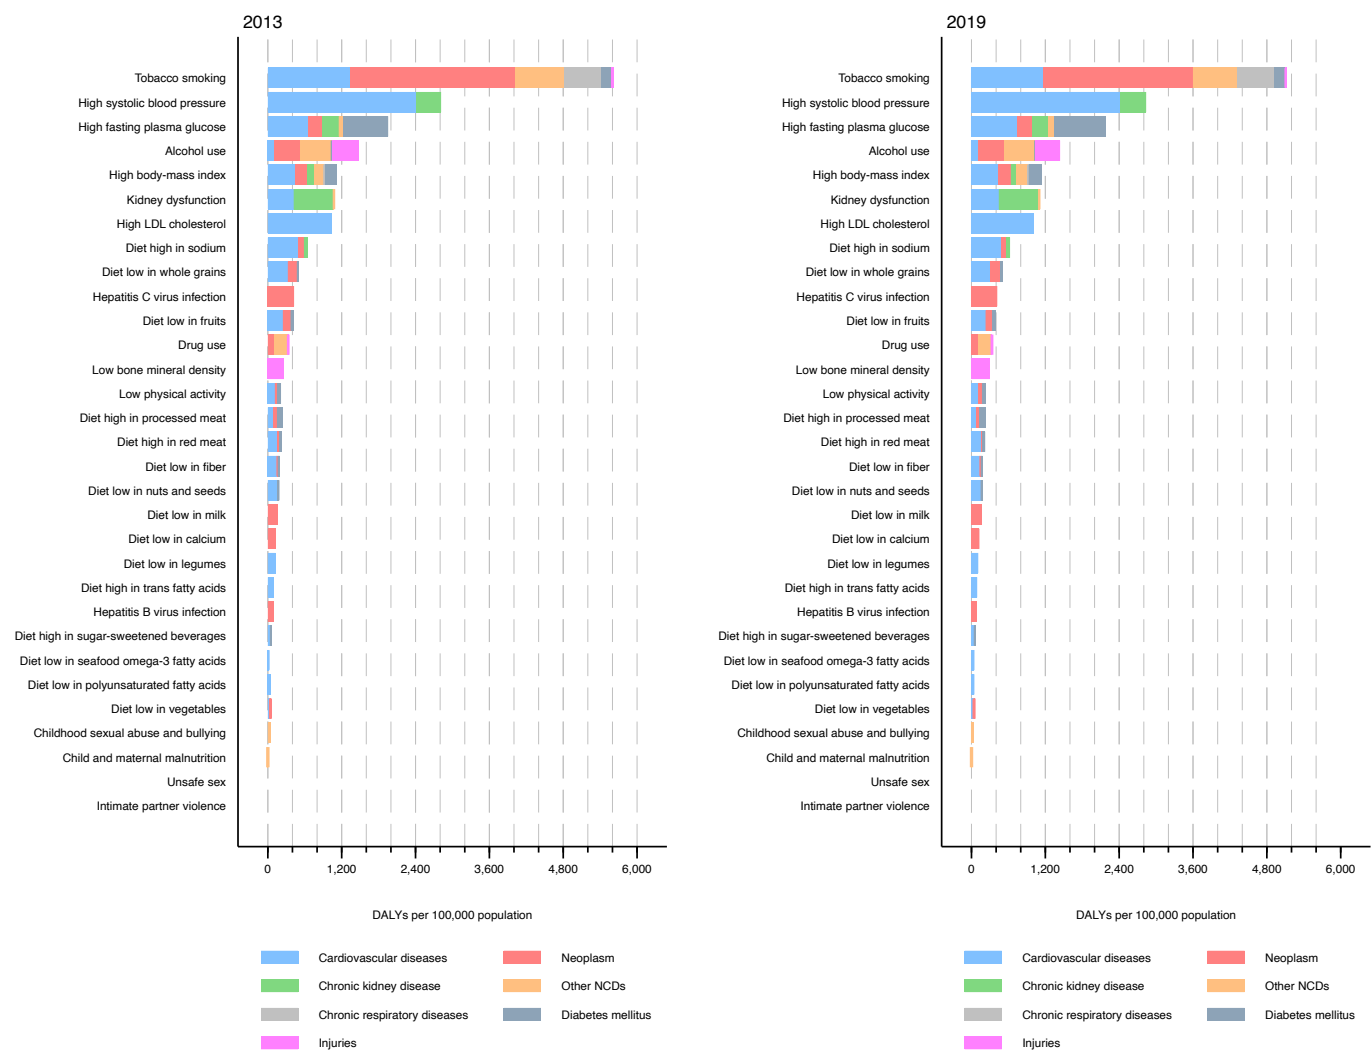

\* Data, except for hepatitis B and C virus infections, were obtained from the GBD results tool: <http://ghdx.healthdata.org/gbd-results-tool>. DALYs: disability-adjusted life years; NCD: non-communicable disease; LDL: low-density lipoprotein. The order of risk factors is sorted by 2019 values.

**Supplementary Figure 12: All-ages mortality rate (per 100,000) attributable to preventable behavioral and metabolic risk factors in 2013 and 2019 for men**

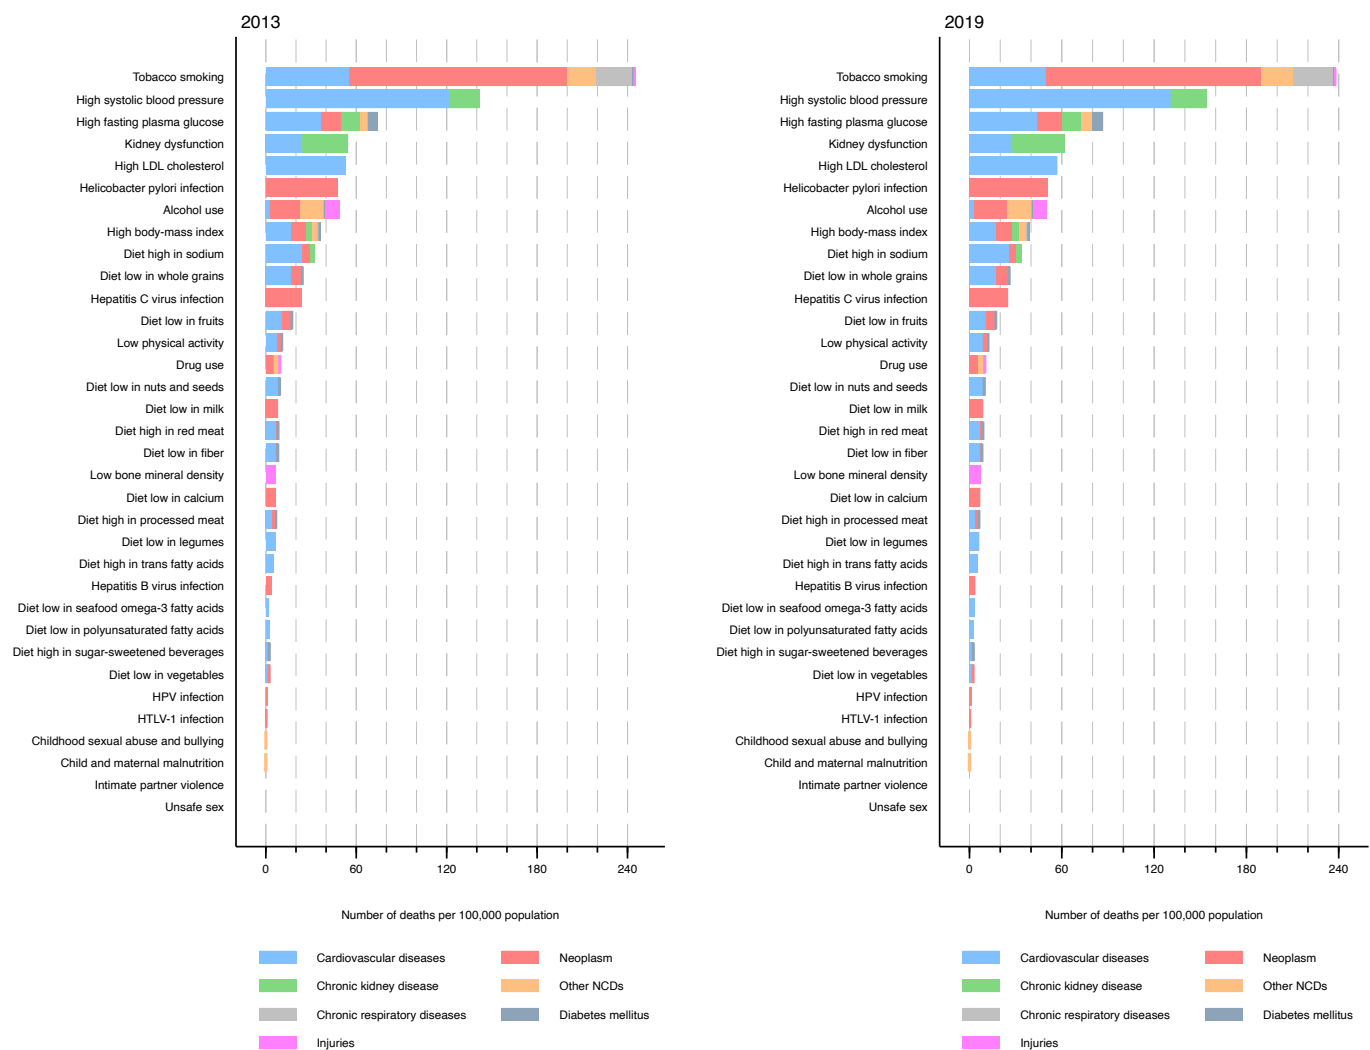

\* Data, except for hepatitis B and C virus infections, *Helicobacter pylori* infection, HPV infection, and HTLV-1 infection, were obtained from the GBD results tool: <http://ghdx.healthdata.org/gbd-results-tool>. NCD: non-communicable disease; LDL: low-density lipoprotein; HPV: human papillomavirus; HTLV-1: human T-cell leukemia virus type 1. The order of risk factors is sorted by 2019 values.

**Supplementary Table 1: Number of deaths from the Vital Statistics by ICD-10 codes in 2013 and 2019, and PAF of HPV infections and HTLV-1 infection in relation to each cause of death**

| Risk factor      | ICD-10 | Cause                                                       | 2013  |     | 2019  |     | PAF*  |       |
|------------------|--------|-------------------------------------------------------------|-------|-----|-------|-----|-------|-------|
|                  |        |                                                             | Women | Men | Women | Men | Women | Men   |
| HPV infection    | C01    | Malignant neoplasm of base of tongue                        | 5     | 23  | 6     | 37  | 46.0  | 46.0  |
| HPV infection    | C02    | Malignant neoplasm of other and unspecified parts of tongue | 501   | 729 | 533   | 821 | 4.3   | 4.3   |
| HPV infection    | C03    | Malignant neoplasm of gum                                   | 612   | 623 | 653   | 482 | 4.3   | 4.3   |
| HPV infection    | C04    | Malignant neoplasm of floor of mouth                        | 70    | 198 | 64    | 179 | 4.3   | 4.3   |
| HPV infection    | C05    | Malignant neoplasm of palate                                | 44    | 43  | 54    | 51  | 4.3   | 4.3   |
| HPV infection    | C06    | Malignant neoplasm of other and unspecified parts of mouth  | 231   | 206 | 273   | 242 | 4.3   | 4.3   |
| HPV infection    | C09    | Malignant neoplasm of tonsil                                | 1     | 24  | 4     | 19  | 46.0  | 46.0  |
| HPV infection    | C10    | Malignant neoplasm of oropharynx                            | 136   | 746 | 164   | 932 | 46.0  | 46.0  |
| HPV infection    | C21    | Malignant neoplasm of anus and anal canal                   | 180   | 170 | 230   | 235 | 88.0  | 88.0  |
| HPV infection    | C51    | Malignant neoplasm of vulva                                 | 214   | –   | 273   | –   | 48.0  | –     |
| HPV infection    | C52    | Malignant neoplasm of vagina                                | 127   | –   | 143   | –   | 78.0  | –     |
| HPV infection    | C53    | Malignant neoplasm of cervix uteri                          | 2682  | –   | 2955  | –   | 100.0 | –     |
| HPV infection    | C60    | Malignant neoplasm of penis                                 | –     | 139 | –     | 159 | –     | 51.0  |
| HTLV-1 infection | C91.5  | Adult T-cell lymphoma/leukaemia [HTLV-1-associated]         | 500   | 528 | 430   | 489 | 100.0 | 100.0 |

ICD-10: the 10th revision of the International Statistical Classification of Diseases and Related Health Problems; HPV: human papillomavirus; HTLV-1: human T-cell leukemia virus type 1; PAF: population attributable fraction.

\* Data were extracted from the following previous studies: Plummer M, de Martel C, Vignat J, Ferlay J, Bray F, Franceschi S. Global burden of cancers attributable to infections in 2012: a synthetic analysis. *Lancet Glob Health* 2016; **4**(9): e609-16; Lin Y, Wang C, Kikuchi S, et al. Burden of cancer attributable to infection in Japan in 2015. *GHM Open* 2021; **1**(2): 63-9.

**Supplementary Table 2: All-age DALYs and number of deaths attributable to preventable behavioral and metabolic risk factors in 2013 and 2019 for both sexes combined**

| Year | Risk factors                           | Cause                   | DALYs     | Number of deaths |
|------|----------------------------------------|-------------------------|-----------|------------------|
| 2013 | Alcohol use                            | Cardiovascular diseases | 58930.80  | 747.95           |
| 2013 | Alcohol use                            | Neoplasms               | 372916.88 | 17377.96         |
| 2013 | Alcohol use                            | Other NCDs              | 439689.04 | 14985.15         |
| 2013 | Alcohol use                            | Diabetes mellitus       | -18698.70 | -221.49          |
| 2013 | Alcohol use                            | Injurie                 | 364541.28 | 7756.45          |
| 2019 | Alcohol use                            | Cardiovascular diseases | 67447.16  | 1185.92          |
| 2019 | Alcohol use                            | Neoplasms               | 368657.94 | 18285.47         |
| 2019 | Alcohol use                            | Other NCDs              | 425555.41 | 15244.11         |
| 2019 | Alcohol use                            | Diabetes mellitus       | -21652.40 | -234.78          |
| 2019 | Alcohol use                            | Injurie                 | 334562.81 | 7073.53          |
| 2013 | Child and maternal malnutrition        | Other NCDs              | 389.55    | 4.39             |
| 2019 | Child and maternal malnutrition        | Other NCDs              | 303.68    | 3.42             |
| 2013 | Childhood sexual abuse and bullying    | Other NCDs              | 52949.51  | 74.86            |
| 2019 | Childhood sexual abuse and bullying    | Other NCDs              | 51834.78  | 73.60            |
| 2013 | Diet high in processed meat            | Cardiovascular diseases | 86290.63  | 4207.19          |
| 2013 | Diet high in processed meat            | Neoplasms               | 55905.91  | 2671.80          |
| 2013 | Diet high in processed meat            | Diabetes mellitus       | 99888.66  | 834.81           |
| 2019 | Diet high in processed meat            | Cardiovascular diseases | 73401.70  | 3845.18          |
| 2019 | Diet high in processed meat            | Neoplasms               | 52096.18  | 2639.37          |
| 2019 | Diet high in processed meat            | Diabetes mellitus       | 108947.52 | 815.24           |
| 2013 | Diet high in red meat                  | Cardiovascular diseases | 166580.08 | 8024.92          |
| 2013 | Diet high in red meat                  | Neoplasms               | 37726.12  | 1832.93          |
| 2013 | Diet high in red meat                  | Diabetes mellitus       | 35665.70  | 342.25           |
| 2019 | Diet high in red meat                  | Cardiovascular diseases | 168019.55 | 8745.72          |
| 2019 | Diet high in red meat                  | Neoplasms               | 38566.11  | 2015.55          |
| 2019 | Diet high in red meat                  | Diabetes mellitus       | 42862.12  | 374.83           |
| 2013 | Diet high in sodium                    | Cardiovascular diseases | 486884.06 | 27348.39         |
| 2013 | Diet high in sodium                    | Neoplasms               | 79943.82  | 4684.18          |
| 2013 | Diet high in sodium                    | Chronic kidney disease  | 65992.77  | 3511.16          |
| 2019 | Diet high in sodium                    | Cardiovascular diseases | 479427.88 | 29506.63         |
| 2019 | Diet high in sodium                    | Neoplasms               | 73464.70  | 4677.41          |
| 2019 | Diet high in sodium                    | Chronic kidney disease  | 64716.29  | 3903.45          |
| 2013 | Diet high in sugar-sweetened beverages | Cardiovascular diseases | 37259.29  | 2571.72          |
| 2013 | Diet high in sugar-sweetened beverages | Diabetes mellitus       | 24626.48  | 256.03           |
| 2019 | Diet high in sugar-sweetened beverages | Cardiovascular diseases | 38328.11  | 2857.54          |
| 2019 | Diet high in sugar-sweetened beverages | Diabetes mellitus       | 30959.07  | 290.44           |
| 2013 | Diet high in trans fatty acids         | Cardiovascular diseases | 97283.50  | 6480.17          |
| 2019 | Diet high in trans fatty acids         | Cardiovascular diseases | 95911.49  | 6984.21          |
| 2013 | Diet low in calcium                    | Neoplasms               | 139603.84 | 8027.69          |
| 2019 | Diet low in calcium                    | Neoplasms               | 139003.97 | 8636.08          |
| 2013 | Diet low in fiber                      | Cardiovascular diseases | 169112.22 | 9567.80          |
| 2013 | Diet low in fiber                      | Neoplasms               | 20735.14  | 1208.50          |
| 2013 | Diet low in fiber                      | Diabetes mellitus       | 22174.85  | 246.30           |

|      |                                         |                         |           |          |
|------|-----------------------------------------|-------------------------|-----------|----------|
| 2019 | Diet low in fiber                       | Cardiovascular diseases | 161553.47 | 9989.71  |
| 2019 | Diet low in fiber                       | Neoplasms               | 20500.04  | 1296.40  |
| 2019 | Diet low in fiber                       | Diabetes mellitus       | 25319.61  | 258.91   |
| 2013 | Diet low in fruits                      | Cardiovascular diseases | 257288.81 | 12820.94 |
| 2013 | Diet low in fruits                      | Neoplasms               | 99799.90  | 5471.86  |
| 2013 | Diet low in fruits                      | Diabetes mellitus       | 49687.80  | 499.72   |
| 2019 | Diet low in fruits                      | Cardiovascular diseases | 245154.25 | 13305.56 |
| 2019 | Diet low in fruits                      | Neoplasms               | 91451.66  | 5391.82  |
| 2019 | Diet low in fruits                      | Diabetes mellitus       | 54886.55  | 508.50   |
| 2013 | Diet low in legumes                     | Cardiovascular diseases | 127031.62 | 8447.49  |
| 2019 | Diet low in legumes                     | Cardiovascular diseases | 118017.91 | 8763.29  |
| 2013 | Diet low in milk                        | Neoplasms               | 174654.22 | 9787.92  |
| 2019 | Diet low in milk                        | Neoplasms               | 178533.45 | 10793.89 |
| 2013 | Diet low in nuts and seeds              | Cardiovascular diseases | 160334.44 | 10996.69 |
| 2013 | Diet low in nuts and seeds              | Diabetes mellitus       | 19111.75  | 219.17   |
| 2019 | Diet low in nuts and seeds              | Cardiovascular diseases | 157237.62 | 11794.82 |
| 2019 | Diet low in nuts and seeds              | Diabetes mellitus       | 22340.00  | 235.86   |
| 2013 | Diet low in polyunsaturated fatty acids | Cardiovascular diseases | 49921.66  | 3246.76  |
| 2019 | Diet low in polyunsaturated fatty acids | Cardiovascular diseases | 48406.09  | 3442.81  |
| 2013 | Diet low in seafood omega-3 fatty acids | Cardiovascular diseases | 28727.66  | 3181.22  |
| 2019 | Diet low in seafood omega-3 fatty acids | Cardiovascular diseases | 55854.02  | 5257.55  |
| 2013 | Diet low in vegetables                  | Cardiovascular diseases | 46426.44  | 2967.01  |
| 2013 | Diet low in vegetables                  | Neoplasms               | 4235.23   | 230.03   |
| 2019 | Diet low in vegetables                  | Cardiovascular diseases | 45484.98  | 3207.28  |
| 2019 | Diet low in vegetables                  | Neoplasms               | 4107.70   | 240.51   |
| 2013 | Diet low in whole grains                | Cardiovascular diseases | 318843.53 | 19572.02 |
| 2013 | Diet low in whole grains                | Neoplasms               | 155385.27 | 8625.96  |
| 2013 | Diet low in whole grains                | Diabetes mellitus       | 34764.11  | 364.23   |
| 2019 | Diet low in whole grains                | Cardiovascular diseases | 313456.31 | 20999.52 |
| 2019 | Diet low in whole grains                | Neoplasms               | 158507.73 | 9487.80  |
| 2019 | Diet low in whole grains                | Diabetes mellitus       | 40497.85  | 389.97   |
| 2013 | Drug use                                | Neoplasms               | 106501.30 | 5411.86  |
| 2013 | Drug use                                | Other NCDs              | 228993.69 | 4216.93  |
| 2013 | Drug use                                | Injurie                 | 9258.50   | 189.70   |
| 2019 | Drug use                                | Neoplasms               | 111888.73 | 6057.20  |
| 2019 | Drug use                                | Other NCDs              | 222359.04 | 4310.66  |
| 2019 | Drug use                                | Injurie                 | 7762.70   | 161.79   |
| 2013 | HPV infection                           | Neoplasms               | NA        | 3832.82  |
| 2019 | HPV infection                           | Neoplasms               | NA        | 4366.53  |
| 2013 | HTLV-1 infection                        | Neoplasms               | NA        | 1028.00  |
| 2019 | HTLV-1 infection                        | Neoplasms               | NA        | 919.00   |
| 2013 | <i>Helicobacter pylori</i> infection    | Neoplasms               | NA        | 46272.78 |
| 2019 | <i>Helicobacter pylori</i> infection    | Neoplasms               | NA        | 49283.78 |
| 2013 | Hepatitis B virus infection             | Neoplasms               | 71950.26  | 3407.12  |
| 2019 | Hepatitis B virus infection             | Neoplasms               | 67538.50  | 3368.15  |
| 2013 | Hepatitis C virus infection             | Neoplasms               | 391420.16 | 23930.62 |

|      |                              |                              |            |           |
|------|------------------------------|------------------------------|------------|-----------|
| 2019 | Hepatitis C virus infection  | Neoplasms                    | 383625.19  | 25051.50  |
| 2013 | High LDL cholesterol         | Cardiovascular diseases      | 1098180.88 | 68788.78  |
| 2019 | High LDL cholesterol         | Cardiovascular diseases      | 1098334.88 | 75782.03  |
| 2013 | High body-mass index         | Cardiovascular diseases      | 471109.91  | 19826.05  |
| 2013 | High body-mass index         | Neoplasms                    | 204838.77  | 10894.04  |
| 2013 | High body-mass index         | Chronic kidney disease       | 116647.45  | 5043.33   |
| 2013 | High body-mass index         | Other NCDs                   | 293028.75  | 9392.42   |
| 2013 | High body-mass index         | Chronic respiratory diseases | 22690.56   | 232.16    |
| 2013 | High body-mass index         | Diabetes mellitus            | 193850.38  | 1445.98   |
| 2019 | High body-mass index         | Cardiovascular diseases      | 466874.38  | 21024.39  |
| 2019 | High body-mass index         | Neoplasms                    | 207154.09  | 11740.97  |
| 2019 | High body-mass index         | Chronic kidney disease       | 114633.69  | 5615.01   |
| 2019 | High body-mass index         | Other NCDs                   | 321541.23  | 11681.06  |
| 2019 | High body-mass index         | Chronic respiratory diseases | 23452.75   | 250.30    |
| 2019 | High body-mass index         | Diabetes mellitus            | 228163.19  | 1510.36   |
| 2013 | High fasting plasma glucose  | Cardiovascular diseases      | 621306.38  | 38848.36  |
| 2013 | High fasting plasma glucose  | Neoplasms                    | 216978.36  | 13171.44  |
| 2013 | High fasting plasma glucose  | Chronic kidney disease       | 313019.53  | 16110.77  |
| 2013 | High fasting plasma glucose  | Other NCDs                   | 115394.76  | 8497.74   |
| 2013 | High fasting plasma glucose  | Diabetes mellitus            | 792262.38  | 8190.04   |
| 2019 | High fasting plasma glucose  | Cardiovascular diseases      | 717172.38  | 47646.45  |
| 2019 | High fasting plasma glucose  | Neoplasms                    | 243409.91  | 15793.96  |
| 2019 | High fasting plasma glucose  | Chronic kidney disease       | 286796.81  | 16892.76  |
| 2019 | High fasting plasma glucose  | Other NCDs                   | 153133.70  | 11691.59  |
| 2019 | High fasting plasma glucose  | Diabetes mellitus            | 917207.31  | 8784.08   |
| 2013 | High systolic blood pressure | Cardiovascular diseases      | 2601975.75 | 151478.14 |
| 2013 | High systolic blood pressure | Chronic kidney disease       | 452756.88  | 25484.87  |
| 2019 | High systolic blood pressure | Cardiovascular diseases      | 2645609.50 | 166023.95 |
| 2019 | High systolic blood pressure | Chronic kidney disease       | 477260.88  | 30360.66  |
| 2013 | Intimate partner violence    | Other NCDs                   | 49350.63   | 0.00      |
| 2013 | Intimate partner violence    | Injurie                      | 7787.61    | 71.09     |
| 2019 | Intimate partner violence    | Other NCDs                   | 47613.55   | 0.00      |
| 2019 | Intimate partner violence    | Injurie                      | 7821.76    | 66.85     |
| 2013 | Kidney dysfunction           | Cardiovascular diseases      | 437405.84  | 29030.57  |
| 2013 | Kidney dysfunction           | Chronic kidney disease       | 766899.56  | 40340.07  |
| 2013 | Kidney dysfunction           | Other NCDs                   | 13050.30   | 0.00      |
| 2019 | Kidney dysfunction           | Cardiovascular diseases      | 461401.41  | 33093.30  |
| 2019 | Kidney dysfunction           | Chronic kidney disease       | 768793.31  | 45324.43  |
| 2019 | Kidney dysfunction           | Other NCDs                   | 15305.70   | 0.00      |
| 2013 | Low bone mineral density     | Injurie                      | 387035.31  | 7695.78   |
| 2019 | Low bone mineral density     | Injurie                      | 445611.97  | 8920.78   |
| 2013 | Low physical activity        | Cardiovascular diseases      | 156742.94  | 12649.80  |
| 2013 | Low physical activity        | Neoplasms                    | 64210.21   | 4243.01   |
| 2013 | Low physical activity        | Diabetes mellitus            | 67639.34   | 917.31    |
| 2019 | Low physical activity        | Cardiovascular diseases      | 169430.09  | 14615.16  |
| 2019 | Low physical activity        | Neoplasms                    | 69114.70   | 4896.53   |



|      |                       |                              |            |           |
|------|-----------------------|------------------------------|------------|-----------|
| 2019 | Low physical activity | Diabetes mellitus            | 81577.53   | 1024.62   |
| 2013 | Tobacco smoking       | Cardiovascular diseases      | 1090582.62 | 45051.94  |
| 2013 | Tobacco smoking       | Neoplasms                    | 2036222.25 | 110735.50 |
| 2013 | Tobacco smoking       | Other NCDs                   | 783271.72  | 16873.07  |
| 2013 | Tobacco smoking       | Chronic respiratory diseases | 466942.22  | 18555.35  |
| 2013 | Tobacco smoking       | Diabetes mellitus            | 138337.58  | 1114.51   |
| 2013 | Tobacco smoking       | Injurie                      | 29190.91   | 542.00    |
| 2019 | Tobacco smoking       | Cardiovascular diseases      | 950184.62  | 40650.62  |
| 2019 | Tobacco smoking       | Neoplasms                    | 1846583.88 | 107019.90 |
| 2019 | Tobacco smoking       | Other NCDs                   | 699115.83  | 18153.41  |
| 2019 | Tobacco smoking       | Chronic respiratory diseases | 463008.19  | 19833.55  |
| 2019 | Tobacco smoking       | Diabetes mellitus            | 146938.16  | 1069.25   |
| 2019 | Tobacco smoking       | Injurie                      | 28246.11   | 511.17    |
| 2013 | Unsafe sex            | Neoplasms                    | 103031.44  | 4172.02   |
| 2019 | Unsafe sex            | Neoplasms                    | 97453.56   | 4210.49   |

\* Data, except for hepatitis B and C virus infections, *Helicobacter pylori* infection, HPV infection, and HTLV-1 infection, were obtained from the GBD results tool: <http://ghdx.healthdata.org/gbd-results-tool>. DALYs: disability-adjusted life years; NCDs: non-communicable diseases; LDL: low-density lipoprotein; HPV: human papillomavirus; HTLV-1: human T-cell leukemia virus type 1. The order of the risk factors is sorted alphabetically.

**Supplementary Table 3: All-age DALYs rate (per 100,000) and mortality rate (per 100,000) attributable to preventable behavioral and metabolic risk factors in 2013 and 2019 for both sexes combined**

| Year | Risk factors                           | Cause                   | DALYs rate | Mortality rate |
|------|----------------------------------------|-------------------------|------------|----------------|
| 2013 | Alcohol use                            | Cardiovascular diseases | 45.45      | 0.58           |
| 2013 | Alcohol use                            | Neoplasms               | 287.62     | 13.40          |
| 2013 | Alcohol use                            | Other NCDs              | 339.12     | 11.56          |
| 2013 | Alcohol use                            | Diabetes mellitus       | -14.42     | -0.17          |
| 2013 | Alcohol use                            | Injurie                 | 281.16     | 5.98           |
| 2019 | Alcohol use                            | Cardiovascular diseases | 52.78      | 0.93           |
| 2019 | Alcohol use                            | Neoplasms               | 288.49     | 14.31          |
| 2019 | Alcohol use                            | Other NCDs              | 333.02     | 11.93          |
| 2019 | Alcohol use                            | Diabetes mellitus       | -16.94     | -0.18          |
| 2019 | Alcohol use                            | Injurie                 | 261.81     | 5.54           |
| 2013 | Child and maternal malnutrition        | Other NCDs              | 0.30       | 0.00           |
| 2019 | Child and maternal malnutrition        | Other NCDs              | 0.24       | 0.00           |
| 2013 | Childhood sexual abuse and bullying    | Other NCDs              | 40.84      | 0.06           |
| 2019 | Childhood sexual abuse and bullying    | Other NCDs              | 40.56      | 0.06           |
| 2013 | Diet high in processed meat            | Cardiovascular diseases | 66.55      | 3.24           |
| 2013 | Diet high in processed meat            | Neoplasms               | 43.12      | 2.06           |
| 2013 | Diet high in processed meat            | Diabetes mellitus       | 77.04      | 0.64           |
| 2019 | Diet high in processed meat            | Cardiovascular diseases | 57.44      | 3.01           |
| 2019 | Diet high in processed meat            | Neoplasms               | 40.77      | 2.07           |
| 2019 | Diet high in processed meat            | Diabetes mellitus       | 85.26      | 0.64           |
| 2013 | Diet high in red meat                  | Cardiovascular diseases | 128.48     | 6.19           |
| 2013 | Diet high in red meat                  | Neoplasms               | 29.10      | 1.41           |
| 2013 | Diet high in red meat                  | Diabetes mellitus       | 27.51      | 0.26           |
| 2019 | Diet high in red meat                  | Cardiovascular diseases | 131.48     | 6.84           |
| 2019 | Diet high in red meat                  | Neoplasms               | 30.18      | 1.58           |
| 2019 | Diet high in red meat                  | Diabetes mellitus       | 33.54      | 0.29           |
| 2013 | Diet high in sodium                    | Cardiovascular diseases | 375.52     | 21.09          |
| 2013 | Diet high in sodium                    | Neoplasms               | 61.66      | 3.61           |
| 2013 | Diet high in sodium                    | Chronic kidney disease  | 50.90      | 2.71           |
| 2019 | Diet high in sodium                    | Cardiovascular diseases | 375.17     | 23.09          |
| 2019 | Diet high in sodium                    | Neoplasms               | 57.49      | 3.66           |
| 2019 | Diet high in sodium                    | Chronic kidney disease  | 50.64      | 3.05           |
| 2013 | Diet high in sugar-sweetened beverages | Cardiovascular diseases | 28.74      | 1.98           |
| 2013 | Diet high in sugar-sweetened beverages | Diabetes mellitus       | 18.99      | 0.20           |
| 2019 | Diet high in sugar-sweetened beverages | Cardiovascular diseases | 29.99      | 2.24           |
| 2019 | Diet high in sugar-sweetened beverages | Diabetes mellitus       | 24.23      | 0.23           |
| 2013 | Diet high in trans fatty acids         | Cardiovascular diseases | 75.03      | 5.00           |
| 2019 | Diet high in trans fatty acids         | Cardiovascular diseases | 75.05      | 5.47           |
| 2013 | Diet low in calcium                    | Neoplasms               | 107.67     | 6.19           |
| 2019 | Diet low in calcium                    | Neoplasms               | 108.78     | 6.76           |
| 2013 | Diet low in fiber                      | Cardiovascular diseases | 130.43     | 7.38           |
| 2013 | Diet low in fiber                      | Neoplasms               | 15.99      | 0.93           |
| 2013 | Diet low in fiber                      | Diabetes mellitus       | 17.10      | 0.19           |

|      |                                         |                         |        |       |
|------|-----------------------------------------|-------------------------|--------|-------|
| 2019 | Diet low in fiber                       | Cardiovascular diseases | 126.42 | 7.82  |
| 2019 | Diet low in fiber                       | Neoplasms               | 16.04  | 1.01  |
| 2019 | Diet low in fiber                       | Diabetes mellitus       | 19.81  | 0.20  |
| 2013 | Diet low in fruits                      | Cardiovascular diseases | 198.44 | 9.89  |
| 2013 | Diet low in fruits                      | Neoplasms               | 76.97  | 4.22  |
| 2013 | Diet low in fruits                      | Diabetes mellitus       | 38.32  | 0.39  |
| 2019 | Diet low in fruits                      | Cardiovascular diseases | 191.84 | 10.41 |
| 2019 | Diet low in fruits                      | Neoplasms               | 71.56  | 4.22  |
| 2019 | Diet low in fruits                      | Diabetes mellitus       | 42.95  | 0.40  |
| 2013 | Diet low in legumes                     | Cardiovascular diseases | 97.98  | 6.52  |
| 2019 | Diet low in legumes                     | Cardiovascular diseases | 92.35  | 6.86  |
| 2013 | Diet low in milk                        | Neoplasms               | 134.70 | 7.55  |
| 2019 | Diet low in milk                        | Neoplasms               | 139.71 | 8.45  |
| 2013 | Diet low in nuts and seeds              | Cardiovascular diseases | 123.66 | 8.48  |
| 2013 | Diet low in nuts and seeds              | Diabetes mellitus       | 14.74  | 0.17  |
| 2019 | Diet low in nuts and seeds              | Cardiovascular diseases | 123.05 | 9.23  |
| 2019 | Diet low in nuts and seeds              | Diabetes mellitus       | 17.48  | 0.18  |
| 2013 | Diet low in polyunsaturated fatty acids | Cardiovascular diseases | 38.50  | 2.50  |
| 2019 | Diet low in polyunsaturated fatty acids | Cardiovascular diseases | 37.88  | 2.69  |
| 2013 | Diet low in seafood omega-3 fatty acids | Cardiovascular diseases | 22.16  | 2.45  |
| 2019 | Diet low in seafood omega-3 fatty acids | Cardiovascular diseases | 43.71  | 4.11  |
| 2013 | Diet low in vegetables                  | Cardiovascular diseases | 35.81  | 2.29  |
| 2013 | Diet low in vegetables                  | Neoplasms               | 3.27   | 0.18  |
| 2019 | Diet low in vegetables                  | Cardiovascular diseases | 35.59  | 2.51  |
| 2019 | Diet low in vegetables                  | Neoplasms               | 3.21   | 0.19  |
| 2013 | Diet low in whole grains                | Cardiovascular diseases | 245.91 | 15.10 |
| 2013 | Diet low in whole grains                | Neoplasms               | 119.84 | 6.65  |
| 2013 | Diet low in whole grains                | Diabetes mellitus       | 26.81  | 0.28  |
| 2019 | Diet low in whole grains                | Cardiovascular diseases | 245.29 | 16.43 |
| 2019 | Diet low in whole grains                | Neoplasms               | 124.04 | 7.42  |
| 2019 | Diet low in whole grains                | Diabetes mellitus       | 31.69  | 0.31  |
| 2013 | Drug use                                | Neoplasms               | 82.14  | 4.17  |
| 2013 | Drug use                                | Other NCDs              | 176.61 | 3.25  |
| 2013 | Drug use                                | Injurie                 | 7.14   | 0.15  |
| 2019 | Drug use                                | Neoplasms               | 87.56  | 4.74  |
| 2019 | Drug use                                | Other NCDs              | 174.01 | 3.37  |
| 2019 | Drug use                                | Injurie                 | 6.07   | 0.13  |
| 2013 | HPV infection                           | Neoplasms               | NA     | 2.96  |
| 2019 | HPV infection                           | Neoplasms               | NA     | 3.42  |
| 2013 | HTLV-1 infection                        | Neoplasms               | NA     | 0.79  |
| 2019 | HTLV-1 infection                        | Neoplasms               | NA     | 0.72  |
| 2013 | <i>Helicobacter pylori</i> infection    | Neoplasms               | NA     | 35.69 |
| 2019 | <i>Helicobacter pylori</i> infection    | Neoplasms               | NA     | 38.57 |
| 2013 | Hepatitis B virus infection             | Neoplasms               | 55.49  | 2.63  |
| 2019 | Hepatitis B virus infection             | Neoplasms               | 52.85  | 2.64  |
| 2013 | Hepatitis C virus infection             | Neoplasms               | 301.89 | 18.46 |

|      |                              |                              |         |        |
|------|------------------------------|------------------------------|---------|--------|
| 2019 | Hepatitis C virus infection  | Neoplasms                    | 300.20  | 19.60  |
| 2013 | High LDL cholesterol         | Cardiovascular diseases      | 846.99  | 53.05  |
| 2019 | High LDL cholesterol         | Cardiovascular diseases      | 859.49  | 59.30  |
| 2013 | High body-mass index         | Cardiovascular diseases      | 363.35  | 15.29  |
| 2013 | High body-mass index         | Neoplasms                    | 157.99  | 8.40   |
| 2013 | High body-mass index         | Chronic kidney disease       | 89.97   | 3.89   |
| 2013 | High body-mass index         | Other NCDs                   | 226.00  | 7.24   |
| 2013 | High body-mass index         | Chronic respiratory diseases | 17.50   | 0.18   |
| 2013 | High body-mass index         | Diabetes mellitus            | 149.51  | 1.12   |
| 2019 | High body-mass index         | Cardiovascular diseases      | 365.35  | 16.45  |
| 2019 | High body-mass index         | Neoplasms                    | 162.11  | 9.19   |
| 2019 | High body-mass index         | Chronic kidney disease       | 89.71   | 4.39   |
| 2019 | High body-mass index         | Other NCDs                   | 251.62  | 9.14   |
| 2019 | High body-mass index         | Chronic respiratory diseases | 18.35   | 0.20   |
| 2019 | High body-mass index         | Diabetes mellitus            | 178.55  | 1.18   |
| 2013 | High fasting plasma glucose  | Cardiovascular diseases      | 479.19  | 29.96  |
| 2013 | High fasting plasma glucose  | Neoplasms                    | 167.35  | 10.16  |
| 2013 | High fasting plasma glucose  | Chronic kidney disease       | 241.42  | 12.43  |
| 2013 | High fasting plasma glucose  | Other NCDs                   | 89.00   | 6.55   |
| 2013 | High fasting plasma glucose  | Diabetes mellitus            | 611.04  | 6.32   |
| 2019 | High fasting plasma glucose  | Cardiovascular diseases      | 561.22  | 37.29  |
| 2019 | High fasting plasma glucose  | Neoplasms                    | 190.48  | 12.36  |
| 2019 | High fasting plasma glucose  | Chronic kidney disease       | 224.43  | 13.22  |
| 2019 | High fasting plasma glucose  | Other NCDs                   | 119.83  | 9.15   |
| 2019 | High fasting plasma glucose  | Diabetes mellitus            | 717.75  | 6.87   |
| 2013 | High systolic blood pressure | Cardiovascular diseases      | 2006.81 | 116.83 |
| 2013 | High systolic blood pressure | Chronic kidney disease       | 349.20  | 19.66  |
| 2019 | High systolic blood pressure | Cardiovascular diseases      | 2070.30 | 129.92 |
| 2019 | High systolic blood pressure | Chronic kidney disease       | 373.48  | 23.76  |
| 2013 | Intimate partner violence    | Other NCDs                   | 38.06   | 0.00   |
| 2013 | Intimate partner violence    | Injurie                      | 6.01    | 0.05   |
| 2019 | Intimate partner violence    | Other NCDs                   | 37.26   | 0.00   |
| 2019 | Intimate partner violence    | Injurie                      | 6.12    | 0.05   |
| 2013 | Kidney dysfunction           | Cardiovascular diseases      | 337.36  | 22.39  |
| 2013 | Kidney dysfunction           | Chronic kidney disease       | 591.48  | 31.11  |
| 2013 | Kidney dysfunction           | Other NCDs                   | 10.07   | 0.00   |
| 2019 | Kidney dysfunction           | Cardiovascular diseases      | 361.07  | 25.90  |
| 2019 | Kidney dysfunction           | Chronic kidney disease       | 601.61  | 35.47  |
| 2019 | Kidney dysfunction           | Other NCDs                   | 11.98   | 0.00   |
| 2013 | Low bone mineral density     | Injurie                      | 298.51  | 5.94   |
| 2019 | Low bone mineral density     | Injurie                      | 348.71  | 6.98   |
| 2013 | Low physical activity        | Cardiovascular diseases      | 120.89  | 9.76   |
| 2013 | Low physical activity        | Neoplasms                    | 49.52   | 3.27   |
| 2013 | Low physical activity        | Diabetes mellitus            | 52.17   | 0.71   |
| 2019 | Low physical activity        | Cardiovascular diseases      | 132.59  | 11.44  |
| 2019 | Low physical activity        | Neoplasms                    | 54.09   | 3.83   |

|      |                       |                              |         |       |
|------|-----------------------|------------------------------|---------|-------|
| 2019 | Low physical activity | Diabetes mellitus            | 63.84   | 0.80  |
| 2013 | Tobacco smoking       | Cardiovascular diseases      | 841.13  | 34.75 |
| 2013 | Tobacco smoking       | Neoplasms                    | 1570.47 | 85.41 |
| 2013 | Tobacco smoking       | Other NCDs                   | 604.11  | 13.01 |
| 2013 | Tobacco smoking       | Chronic respiratory diseases | 360.14  | 14.31 |
| 2013 | Tobacco smoking       | Diabetes mellitus            | 106.69  | 0.86  |
| 2013 | Tobacco smoking       | Injurie                      | 22.51   | 0.42  |
| 2019 | Tobacco smoking       | Cardiovascular diseases      | 743.56  | 31.81 |
| 2019 | Tobacco smoking       | Neoplasms                    | 1445.03 | 83.75 |
| 2019 | Tobacco smoking       | Other NCDs                   | 547.09  | 14.21 |
| 2019 | Tobacco smoking       | Chronic respiratory diseases | 362.32  | 15.52 |
| 2019 | Tobacco smoking       | Diabetes mellitus            | 114.99  | 0.84  |
| 2019 | Tobacco smoking       | Injurie                      | 22.10   | 0.40  |
| 2013 | Unsafe sex            | Neoplasms                    | 79.46   | 3.22  |
| 2019 | Unsafe sex            | Neoplasms                    | 76.26   | 3.29  |

\* Data, except for hepatitis B and C virus infections, *Helicobacter pylori* infection, HPV infection, and HTLV-1 infection, were obtained from the GBD results tool: <http://ghdx.healthdata.org/gbd-results-tool>. DALYs: disability-adjusted life years; NCDs: non-communicable diseases; LDL: low-density lipoprotein; HPV: human papillomavirus; HTLV-1: human T-cell leukemia virus type 1. The order of the risk factors is sorted alphabetically.

**Supplementary Table 4: All-age DALYs and number of deaths attributable to preventable behavioral and metabolic risk factors in 2013 and 2019 for women**

| Year | Risk factors                           | Cause                   | DALYs     | Number of deaths |
|------|----------------------------------------|-------------------------|-----------|------------------|
| 2013 | Alcohol use                            | Cardiovascular diseases | -4769.32  | -951.31          |
| 2013 | Alcohol use                            | Neoplasms               | 104126.20 | 4695.02          |
| 2013 | Alcohol use                            | Other NCDs              | 112780.66 | 4403.19          |
| 2013 | Alcohol use                            | Diabetes mellitus       | -21851.72 | -229.54          |
| 2013 | Alcohol use                            | Injurie                 | 93029.66  | 1695.29          |
| 2019 | Alcohol use                            | Cardiovascular diseases | -2555.15  | -892.24          |
| 2019 | Alcohol use                            | Neoplasms               | 104404.38 | 5066.85          |
| 2019 | Alcohol use                            | Other NCDs              | 112936.65 | 4727.80          |
| 2019 | Alcohol use                            | Diabetes mellitus       | -26081.85 | -246.76          |
| 2019 | Alcohol use                            | Injurie                 | 89108.32  | 1577.24          |
| 2013 | Child and maternal malnutrition        | Other NCDs              | 175.33    | 1.97             |
| 2019 | Child and maternal malnutrition        | Other NCDs              | 134.56    | 1.51             |
| 2013 | Childhood sexual abuse and bullying    | Other NCDs              | 27613.69  | 11.11            |
| 2019 | Childhood sexual abuse and bullying    | Other NCDs              | 27076.05  | 11.01            |
| 2013 | Diet high in processed meat            | Cardiovascular diseases | 26072.47  | 1618.87          |
| 2013 | Diet high in processed meat            | Neoplasms               | 22749.92  | 1173.30          |
| 2013 | Diet high in processed meat            | Diabetes mellitus       | 41019.68  | 370.72           |
| 2019 | Diet high in processed meat            | Cardiovascular diseases | 23199.27  | 1570.05          |
| 2019 | Diet high in processed meat            | Neoplasms               | 21405.61  | 1184.09          |
| 2019 | Diet high in processed meat            | Diabetes mellitus       | 46851.95  | 376.05           |
| 2013 | Diet high in red meat                  | Cardiovascular diseases | 67651.83  | 3780.15          |
| 2013 | Diet high in red meat                  | Neoplasms               | 21425.00  | 1041.65          |
| 2013 | Diet high in red meat                  | Diabetes mellitus       | 14418.11  | 163.88           |
| 2019 | Diet high in red meat                  | Cardiovascular diseases | 70846.44  | 4270.82          |
| 2019 | Diet high in red meat                  | Neoplasms               | 21799.19  | 1146.16          |
| 2019 | Diet high in red meat                  | Diabetes mellitus       | 18183.91  | 184.30           |
| 2013 | Diet high in sodium                    | Cardiovascular diseases | 172352.42 | 11894.31         |
| 2013 | Diet high in sodium                    | Neoplasms               | 24162.12  | 1597.90          |
| 2013 | Diet high in sodium                    | Chronic kidney disease  | 25665.56  | 1576.59          |
| 2019 | Diet high in sodium                    | Cardiovascular diseases | 178760.23 | 13439.42         |
| 2019 | Diet high in sodium                    | Neoplasms               | 22757.14  | 1643.12          |
| 2019 | Diet high in sodium                    | Chronic kidney disease  | 25710.71  | 1796.04          |
| 2013 | Diet high in sugar-sweetened beverages | Cardiovascular diseases | 13281.14  | 1214.41          |
| 2013 | Diet high in sugar-sweetened beverages | Diabetes mellitus       | 10321.05  | 129.15           |
| 2019 | Diet high in sugar-sweetened beverages | Cardiovascular diseases | 14344.62  | 1388.49          |
| 2019 | Diet high in sugar-sweetened beverages | Diabetes mellitus       | 13656.64  | 149.72           |
| 2013 | Diet high in trans fatty acids         | Cardiovascular diseases | 36701.42  | 3208.21          |
| 2019 | Diet high in trans fatty acids         | Cardiovascular diseases | 38052.25  | 3571.02          |
| 2013 | Diet low in calcium                    | Neoplasms               | 58052.58  | 3869.23          |
| 2019 | Diet low in calcium                    | Neoplasms               | 58857.39  | 4247.07          |
| 2013 | Diet low in fiber                      | Cardiovascular diseases | 74716.44  | 5189.55          |
| 2013 | Diet low in fiber                      | Neoplasms               | 9601.15   | 648.91           |
| 2013 | Diet low in fiber                      | Diabetes mellitus       | 9637.87   | 133.05           |

|      |                                         |                         |           |          |
|------|-----------------------------------------|-------------------------|-----------|----------|
| 2019 | Diet low in fiber                       | Cardiovascular diseases | 75233.11  | 5613.02  |
| 2019 | Diet low in fiber                       | Neoplasms               | 9768.26   | 713.00   |
| 2019 | Diet low in fiber                       | Diabetes mellitus       | 11618.38  | 143.80   |
| 2013 | Diet low in fruits                      | Cardiovascular diseases | 102913.06 | 6135.46  |
| 2013 | Diet low in fruits                      | Neoplasms               | 21201.93  | 1351.68  |
| 2013 | Diet low in fruits                      | Diabetes mellitus       | 19245.44  | 244.16   |
| 2019 | Diet low in fruits                      | Cardiovascular diseases | 102950.30 | 6685.46  |
| 2019 | Diet low in fruits                      | Neoplasms               | 21252.98  | 1465.23  |
| 2019 | Diet low in fruits                      | Diabetes mellitus       | 22598.41  | 260.78   |
| 2013 | Diet low in legumes                     | Cardiovascular diseases | 49730.73  | 4460.60  |
| 2019 | Diet low in legumes                     | Cardiovascular diseases | 49194.60  | 4802.56  |
| 2013 | Diet low in milk                        | Neoplasms               | 72510.68  | 4634.63  |
| 2019 | Diet low in milk                        | Neoplasms               | 75290.08  | 5211.05  |
| 2013 | Diet low in nuts and seeds              | Cardiovascular diseases | 58184.57  | 5319.32  |
| 2013 | Diet low in nuts and seeds              | Diabetes mellitus       | 7925.82   | 111.13   |
| 2019 | Diet low in nuts and seeds              | Cardiovascular diseases | 60177.07  | 5877.65  |
| 2019 | Diet low in nuts and seeds              | Diabetes mellitus       | 9694.22   | 122.11   |
| 2013 | Diet low in polyunsaturated fatty acids | Cardiovascular diseases | 18348.59  | 1580.87  |
| 2019 | Diet low in polyunsaturated fatty acids | Cardiovascular diseases | 18762.30  | 1737.12  |
| 2013 | Diet low in seafood omega-3 fatty acids | Cardiovascular diseases | 15821.57  | 2114.26  |
| 2019 | Diet low in seafood omega-3 fatty acids | Cardiovascular diseases | 25805.90  | 3086.75  |
| 2013 | Diet low in vegetables                  | Cardiovascular diseases | 21098.71  | 1669.69  |
| 2013 | Diet low in vegetables                  | Neoplasms               | 733.32    | 49.28    |
| 2019 | Diet low in vegetables                  | Cardiovascular diseases | 21409.35  | 1828.72  |
| 2019 | Diet low in vegetables                  | Neoplasms               | 728.64    | 52.78    |
| 2013 | Diet low in whole grains                | Cardiovascular diseases | 113647.62 | 9011.11  |
| 2013 | Diet low in whole grains                | Neoplasms               | 63247.92  | 3989.41  |
| 2013 | Diet low in whole grains                | Diabetes mellitus       | 14143.09  | 176.88   |
| 2019 | Diet low in whole grains                | Cardiovascular diseases | 117905.69 | 10043.34 |
| 2019 | Diet low in whole grains                | Neoplasms               | 65471.58  | 4471.18  |
| 2019 | Diet low in whole grains                | Diabetes mellitus       | 17243.72  | 194.20   |
| 2013 | Drug use                                | Neoplasms               | 36639.44  | 2121.69  |
| 2013 | Drug use                                | Other NCDs              | 92926.65  | 1696.06  |
| 2013 | Drug use                                | Injurie                 | 2261.04   | 47.05    |
| 2019 | Drug use                                | Neoplasms               | 39766.98  | 2457.88  |
| 2019 | Drug use                                | Other NCDs              | 90061.42  | 1769.50  |
| 2019 | Drug use                                | Injurie                 | 1854.02   | 39.78    |
| 2013 | HPV infection                           | Neoplasms               | NA        | 3170.19  |
| 2019 | HPV infection                           | Neoplasms               | NA        | 3547.83  |
| 2013 | HTLV-1 infection                        | Neoplasms               | NA        | 500.00   |
| 2019 | HTLV-1 infection                        | Neoplasms               | NA        | 430.00   |
| 2013 | <i>Helicobacter pylori</i> infection    | Neoplasms               | NA        | 16080.88 |
| 2019 | <i>Helicobacter pylori</i> infection    | Neoplasms               | NA        | 17493.30 |
| 2013 | Hepatitis B virus infection             | Neoplasms               | 16456.26  | 939.36   |
| 2019 | Hepatitis B virus infection             | Neoplasms               | 15883.52  | 960.88   |
| 2013 | Hepatitis C virus infection             | Neoplasms               | 121794.17 | 8784.91  |

|      |                              |                              |            |          |
|------|------------------------------|------------------------------|------------|----------|
| 2019 | Hepatitis C virus infection  | Neoplasms                    | 122770.70  | 9400.62  |
| 2013 | High LDL cholesterol         | Cardiovascular diseases      | 442578.66  | 35295.86 |
| 2019 | High LDL cholesterol         | Cardiovascular diseases      | 467099.81  | 40177.75 |
| 2013 | High body-mass index         | Cardiovascular diseases      | 184854.56  | 9076.57  |
| 2013 | High body-mass index         | Neoplasms                    | 79511.45   | 4682.84  |
| 2013 | High body-mass index         | Chronic kidney disease       | 54025.33   | 2584.80  |
| 2013 | High body-mass index         | Other NCDs                   | 189904.13  | 6757.23  |
| 2013 | High body-mass index         | Chronic respiratory diseases | 13432.56   | 137.36   |
| 2013 | High body-mass index         | Diabetes mellitus            | 77803.29   | 652.20   |
| 2019 | High body-mass index         | Cardiovascular diseases      | 193024.03  | 10210.92 |
| 2019 | High body-mass index         | Neoplasms                    | 82683.59   | 5171.16  |
| 2019 | High body-mass index         | Chronic kidney disease       | 54663.70   | 2987.19  |
| 2019 | High body-mass index         | Other NCDs                   | 210213.13  | 8306.55  |
| 2019 | High body-mass index         | Chronic respiratory diseases | 14195.61   | 153.14   |
| 2019 | High body-mass index         | Diabetes mellitus            | 97506.52   | 714.09   |
| 2013 | High fasting plasma glucose  | Cardiovascular diseases      | 206333.84  | 15537.50 |
| 2013 | High fasting plasma glucose  | Neoplasms                    | 70258.66   | 4597.75  |
| 2013 | High fasting plasma glucose  | Chronic kidney disease       | 146868.06  | 8454.00  |
| 2013 | High fasting plasma glucose  | Other NCDs                   | 67826.74   | 5296.02  |
| 2013 | High fasting plasma glucose  | Diabetes mellitus            | 331745.62  | 4032.23  |
| 2019 | High fasting plasma glucose  | Cardiovascular diseases      | 253892.22  | 20034.62 |
| 2019 | High fasting plasma glucose  | Neoplasms                    | 85577.94   | 5972.73  |
| 2019 | High fasting plasma glucose  | Chronic kidney disease       | 133058.77  | 8969.64  |
| 2019 | High fasting plasma glucose  | Other NCDs                   | 91342.85   | 7306.93  |
| 2019 | High fasting plasma glucose  | Diabetes mellitus            | 400667.81  | 4436.76  |
| 2013 | High systolic blood pressure | Cardiovascular diseases      | 1072398.70 | 74519.96 |
| 2013 | High systolic blood pressure | Chronic kidney disease       | 202915.34  | 12879.54 |
| 2019 | High systolic blood pressure | Cardiovascular diseases      | 1135872.16 | 84592.67 |
| 2019 | High systolic blood pressure | Chronic kidney disease       | 219653.83  | 15880.24 |
| 2013 | Intimate partner violence    | Other NCDs                   | 49350.63   | 0.00     |
| 2013 | Intimate partner violence    | Injurie                      | 7787.61    | 71.09    |
| 2019 | Intimate partner violence    | Other NCDs                   | 47613.55   | 0.00     |
| 2019 | Intimate partner violence    | Injurie                      | 7821.76    | 66.85    |
| 2013 | Kidney dysfunction           | Cardiovascular diseases      | 171760.84  | 13919.89 |
| 2013 | Kidney dysfunction           | Chronic kidney disease       | 357991.34  | 20963.93 |
| 2013 | Kidney dysfunction           | Other NCDs                   | 3906.20    | 0.00     |
| 2019 | Kidney dysfunction           | Cardiovascular diseases      | 185282.11  | 16022.11 |
| 2019 | Kidney dysfunction           | Chronic kidney disease       | 364228.41  | 23980.87 |
| 2019 | Kidney dysfunction           | Other NCDs                   | 4541.26    | 0.00     |
| 2013 | Low bone mineral density     | Injurie                      | 221738.25  | 3705.97  |
| 2019 | Low bone mineral density     | Injurie                      | 259854.33  | 4325.56  |
| 2013 | Low physical activity        | Cardiovascular diseases      | 84440.44   | 7827.56  |
| 2013 | Low physical activity        | Neoplasms                    | 35100.27   | 2491.20  |
| 2013 | Low physical activity        | Diabetes mellitus            | 33759.13   | 536.46   |
| 2019 | Low physical activity        | Cardiovascular diseases      | 94455.45   | 9208.77  |
| 2019 | Low physical activity        | Neoplasms                    | 38026.79   | 2902.39  |



|      |                       |                              |           |          |
|------|-----------------------|------------------------------|-----------|----------|
| 2019 | Low physical activity | Diabetes mellitus            | 42207.89  | 607.94   |
| 2013 | Tobacco smoking       | Cardiovascular diseases      | 240289.70 | 10006.64 |
| 2013 | Tobacco smoking       | Neoplasms                    | 346521.88 | 19107.71 |
| 2013 | Tobacco smoking       | Other NCDs                   | 276101.67 | 5060.88  |
| 2013 | Tobacco smoking       | Chronic respiratory diseases | 90428.28  | 3429.07  |
| 2013 | Tobacco smoking       | Diabetes mellitus            | 36786.26  | 331.68   |
| 2013 | Tobacco smoking       | Injurie                      | 8072.94   | 86.11    |
| 2019 | Tobacco smoking       | Cardiovascular diseases      | 223367.14 | 9789.15  |
| 2019 | Tobacco smoking       | Neoplasms                    | 332794.34 | 19646.64 |
| 2019 | Tobacco smoking       | Other NCDs                   | 247413.32 | 5434.25  |
| 2019 | Tobacco smoking       | Chronic respiratory diseases | 90781.95  | 3671.75  |
| 2019 | Tobacco smoking       | Diabetes mellitus            | 43332.55  | 349.79   |
| 2019 | Tobacco smoking       | Injurie                      | 8393.80   | 86.42    |
| 2013 | Unsafe sex            | Neoplasms                    | 103031.44 | 4172.02  |
| 2019 | Unsafe sex            | Neoplasms                    | 97453.56  | 4210.49  |

\* Data, except for hepatitis B and C virus infections, *Helicobacter pylori* infection, HPV infection, and HTLV-1 infection, were obtained from the GBD results tool: <http://ghdx.healthdata.org/gbd-results-tool>. DALYs: disability-adjusted life years; NCDs: non-communicable diseases; LDL: low-density lipoprotein; HPV: human papillomavirus; HTLV-1: human T-cell leukemia virus type 1. The order of the risk factors is sorted alphabetically.

**Supplementary Table 5: All-age DALYs rate (per 100,000) and mortality rate (per 100,000) attributable to preventable behavioral and metabolic risk factors in 2013 and 2019 for women**

| Year | Risk factors                           | Cause                   | DALYs rate | Mortality rate |
|------|----------------------------------------|-------------------------|------------|----------------|
| 2013 | Alcohol use                            | Cardiovascular diseases | -7.18      | -1.43          |
| 2013 | Alcohol use                            | Neoplasms               | 156.69     | 7.07           |
| 2013 | Alcohol use                            | Other NCDs              | 169.72     | 6.63           |
| 2013 | Alcohol use                            | Diabetes mellitus       | -32.88     | -0.35          |
| 2013 | Alcohol use                            | Injurie                 | 139.99     | 2.55           |
| 2019 | Alcohol use                            | Cardiovascular diseases | -3.90      | -1.36          |
| 2019 | Alcohol use                            | Neoplasms               | 159.35     | 7.73           |
| 2019 | Alcohol use                            | Other NCDs              | 172.38     | 7.22           |
| 2019 | Alcohol use                            | Diabetes mellitus       | -39.81     | -0.38          |
| 2019 | Alcohol use                            | Injurie                 | 136.01     | 2.41           |
| 2013 | Child and maternal malnutrition        | Other NCDs              | 0.26       | 0.00           |
| 2019 | Child and maternal malnutrition        | Other NCDs              | 0.21       | 0.00           |
| 2013 | Childhood sexual abuse and bullying    | Other NCDs              | 41.55      | 0.02           |
| 2019 | Childhood sexual abuse and bullying    | Other NCDs              | 41.33      | 0.02           |
| 2013 | Diet high in processed meat            | Cardiovascular diseases | 39.23      | 2.44           |
| 2013 | Diet high in processed meat            | Neoplasms               | 34.23      | 1.77           |
| 2013 | Diet high in processed meat            | Diabetes mellitus       | 61.73      | 0.56           |
| 2019 | Diet high in processed meat            | Cardiovascular diseases | 35.41      | 2.40           |
| 2019 | Diet high in processed meat            | Neoplasms               | 32.67      | 1.81           |
| 2019 | Diet high in processed meat            | Diabetes mellitus       | 71.51      | 0.57           |
| 2013 | Diet high in red meat                  | Cardiovascular diseases | 101.80     | 5.69           |
| 2013 | Diet high in red meat                  | Neoplasms               | 32.24      | 1.57           |
| 2013 | Diet high in red meat                  | Diabetes mellitus       | 21.70      | 0.25           |
| 2019 | Diet high in red meat                  | Cardiovascular diseases | 108.13     | 6.52           |
| 2019 | Diet high in red meat                  | Neoplasms               | 33.27      | 1.75           |
| 2019 | Diet high in red meat                  | Diabetes mellitus       | 27.75      | 0.28           |
| 2013 | Diet high in sodium                    | Cardiovascular diseases | 259.36     | 17.90          |
| 2013 | Diet high in sodium                    | Neoplasms               | 36.36      | 2.40           |
| 2013 | Diet high in sodium                    | Chronic kidney disease  | 38.62      | 2.37           |
| 2019 | Diet high in sodium                    | Cardiovascular diseases | 272.84     | 20.51          |
| 2019 | Diet high in sodium                    | Neoplasms               | 34.73      | 2.51           |
| 2019 | Diet high in sodium                    | Chronic kidney disease  | 39.24      | 2.74           |
| 2013 | Diet high in sugar-sweetened beverages | Cardiovascular diseases | 19.99      | 1.83           |
| 2013 | Diet high in sugar-sweetened beverages | Diabetes mellitus       | 15.53      | 0.19           |
| 2019 | Diet high in sugar-sweetened beverages | Cardiovascular diseases | 21.89      | 2.12           |
| 2019 | Diet high in sugar-sweetened beverages | Diabetes mellitus       | 20.84      | 0.23           |
| 2013 | Diet high in trans fatty acids         | Cardiovascular diseases | 55.23      | 4.83           |
| 2019 | Diet high in trans fatty acids         | Cardiovascular diseases | 58.08      | 5.45           |
| 2013 | Diet low in calcium                    | Neoplasms               | 87.36      | 5.82           |
| 2019 | Diet low in calcium                    | Neoplasms               | 89.83      | 6.48           |
| 2013 | Diet low in fiber                      | Cardiovascular diseases | 112.44     | 7.81           |
| 2013 | Diet low in fiber                      | Neoplasms               | 14.45      | 0.98           |
| 2013 | Diet low in fiber                      | Diabetes mellitus       | 14.50      | 0.20           |

|      |                                         |                         |        |       |
|------|-----------------------------------------|-------------------------|--------|-------|
| 2019 | Diet low in fiber                       | Cardiovascular diseases | 114.83 | 8.57  |
| 2019 | Diet low in fiber                       | Neoplasms               | 14.91  | 1.09  |
| 2019 | Diet low in fiber                       | Diabetes mellitus       | 17.73  | 0.22  |
| 2013 | Diet low in fruits                      | Cardiovascular diseases | 154.87 | 9.23  |
| 2013 | Diet low in fruits                      | Neoplasms               | 31.91  | 2.03  |
| 2013 | Diet low in fruits                      | Diabetes mellitus       | 28.96  | 0.37  |
| 2019 | Diet low in fruits                      | Cardiovascular diseases | 157.13 | 10.20 |
| 2019 | Diet low in fruits                      | Neoplasms               | 32.44  | 2.24  |
| 2019 | Diet low in fruits                      | Diabetes mellitus       | 34.49  | 0.40  |
| 2013 | Diet low in legumes                     | Cardiovascular diseases | 74.84  | 6.71  |
| 2019 | Diet low in legumes                     | Cardiovascular diseases | 75.09  | 7.33  |
| 2013 | Diet low in milk                        | Neoplasms               | 109.12 | 6.97  |
| 2019 | Diet low in milk                        | Neoplasms               | 114.92 | 7.95  |
| 2013 | Diet low in nuts and seeds              | Cardiovascular diseases | 87.56  | 8.00  |
| 2013 | Diet low in nuts and seeds              | Diabetes mellitus       | 11.93  | 0.17  |
| 2019 | Diet low in nuts and seeds              | Cardiovascular diseases | 91.85  | 8.97  |
| 2019 | Diet low in nuts and seeds              | Diabetes mellitus       | 14.80  | 0.19  |
| 2013 | Diet low in polyunsaturated fatty acids | Cardiovascular diseases | 27.61  | 2.38  |
| 2019 | Diet low in polyunsaturated fatty acids | Cardiovascular diseases | 28.64  | 2.65  |
| 2013 | Diet low in seafood omega-3 fatty acids | Cardiovascular diseases | 23.81  | 3.18  |
| 2019 | Diet low in seafood omega-3 fatty acids | Cardiovascular diseases | 39.39  | 4.71  |
| 2013 | Diet low in vegetables                  | Cardiovascular diseases | 31.75  | 2.51  |
| 2013 | Diet low in vegetables                  | Neoplasms               | 1.10   | 0.07  |
| 2019 | Diet low in vegetables                  | Cardiovascular diseases | 32.68  | 2.79  |
| 2019 | Diet low in vegetables                  | Neoplasms               | 1.11   | 0.08  |
| 2013 | Diet low in whole grains                | Cardiovascular diseases | 171.02 | 13.56 |
| 2013 | Diet low in whole grains                | Neoplasms               | 95.18  | 6.00  |
| 2013 | Diet low in whole grains                | Diabetes mellitus       | 21.28  | 0.27  |
| 2019 | Diet low in whole grains                | Cardiovascular diseases | 179.96 | 15.33 |
| 2019 | Diet low in whole grains                | Neoplasms               | 99.93  | 6.82  |
| 2019 | Diet low in whole grains                | Diabetes mellitus       | 26.32  | 0.30  |
| 2013 | Drug use                                | Neoplasms               | 55.14  | 3.19  |
| 2013 | Drug use                                | Other NCDs              | 139.84 | 2.55  |
| 2013 | Drug use                                | Injurie                 | 3.40   | 0.07  |
| 2019 | Drug use                                | Neoplasms               | 60.70  | 3.75  |
| 2019 | Drug use                                | Other NCDs              | 137.46 | 2.70  |
| 2019 | Drug use                                | Injurie                 | 2.83   | 0.06  |
| 2013 | HPV infection                           | Neoplasms               | NA     | 4.77  |
| 2019 | HPV infection                           | Neoplasms               | NA     | 5.42  |
| 2013 | HTLV-1 infection                        | Neoplasms               | NA     | 0.75  |
| 2019 | HTLV-1 infection                        | Neoplasms               | NA     | 0.66  |
| 2013 | <i>Helicobacter pylori</i> infection    | Neoplasms               | NA     | 24.20 |
| 2019 | <i>Helicobacter pylori</i> infection    | Neoplasms               | NA     | 26.70 |
| 2013 | Hepatitis B virus infection             | Neoplasms               | 24.76  | 1.41  |
| 2019 | Hepatitis B virus infection             | Neoplasms               | 24.24  | 1.47  |
| 2013 | Hepatitis C virus infection             | Neoplasms               | 183.28 | 13.22 |

|      |                              |                              |         |        |
|------|------------------------------|------------------------------|---------|--------|
| 2019 | Hepatitis C virus infection  | Neoplasms                    | 187.38  | 14.35  |
| 2013 | High LDL cholesterol         | Cardiovascular diseases      | 666.01  | 53.11  |
| 2019 | High LDL cholesterol         | Cardiovascular diseases      | 712.93  | 61.32  |
| 2013 | High body-mass index         | Cardiovascular diseases      | 278.18  | 13.66  |
| 2013 | High body-mass index         | Neoplasms                    | 119.65  | 7.05   |
| 2013 | High body-mass index         | Chronic kidney disease       | 81.30   | 3.89   |
| 2013 | High body-mass index         | Other NCDs                   | 285.77  | 10.17  |
| 2013 | High body-mass index         | Chronic respiratory diseases | 20.21   | 0.21   |
| 2013 | High body-mass index         | Diabetes mellitus            | 117.08  | 0.98   |
| 2019 | High body-mass index         | Cardiovascular diseases      | 294.61  | 15.58  |
| 2019 | High body-mass index         | Neoplasms                    | 126.20  | 7.89   |
| 2019 | High body-mass index         | Chronic kidney disease       | 83.43   | 4.56   |
| 2019 | High body-mass index         | Other NCDs                   | 320.85  | 12.68  |
| 2019 | High body-mass index         | Chronic respiratory diseases | 21.67   | 0.23   |
| 2019 | High body-mass index         | Diabetes mellitus            | 148.82  | 1.09   |
| 2013 | High fasting plasma glucose  | Cardiovascular diseases      | 310.50  | 23.38  |
| 2013 | High fasting plasma glucose  | Neoplasms                    | 105.73  | 6.92   |
| 2013 | High fasting plasma glucose  | Chronic kidney disease       | 221.01  | 12.72  |
| 2013 | High fasting plasma glucose  | Other NCDs                   | 102.07  | 7.97   |
| 2013 | High fasting plasma glucose  | Diabetes mellitus            | 499.22  | 6.07   |
| 2019 | High fasting plasma glucose  | Cardiovascular diseases      | 387.52  | 30.58  |
| 2019 | High fasting plasma glucose  | Neoplasms                    | 130.62  | 9.12   |
| 2019 | High fasting plasma glucose  | Chronic kidney disease       | 203.09  | 13.69  |
| 2019 | High fasting plasma glucose  | Other NCDs                   | 139.42  | 11.15  |
| 2019 | High fasting plasma glucose  | Diabetes mellitus            | 611.54  | 6.77   |
| 2013 | High systolic blood pressure | Cardiovascular diseases      | 1613.78 | 112.14 |
| 2013 | High systolic blood pressure | Chronic kidney disease       | 305.35  | 19.38  |
| 2019 | High systolic blood pressure | Cardiovascular diseases      | 1733.68 | 129.11 |
| 2019 | High systolic blood pressure | Chronic kidney disease       | 335.26  | 24.24  |
| 2013 | Intimate partner violence    | Other NCDs                   | 74.26   | 0.00   |
| 2013 | Intimate partner violence    | Injurie                      | 11.72   | 0.11   |
| 2019 | Intimate partner violence    | Other NCDs                   | 72.67   | 0.00   |
| 2019 | Intimate partner violence    | Injurie                      | 11.94   | 0.10   |
| 2013 | Kidney dysfunction           | Cardiovascular diseases      | 258.47  | 20.95  |
| 2013 | Kidney dysfunction           | Chronic kidney disease       | 538.72  | 31.55  |
| 2013 | Kidney dysfunction           | Other NCDs                   | 5.88    | 0.00   |
| 2019 | Kidney dysfunction           | Cardiovascular diseases      | 282.80  | 24.45  |
| 2019 | Kidney dysfunction           | Chronic kidney disease       | 555.92  | 36.60  |
| 2019 | Kidney dysfunction           | Other NCDs                   | 6.93    | 0.00   |
| 2013 | Low bone mineral density     | Injurie                      | 333.68  | 5.58   |
| 2019 | Low bone mineral density     | Injurie                      | 396.62  | 6.60   |
| 2013 | Low physical activity        | Cardiovascular diseases      | 127.07  | 11.78  |
| 2013 | Low physical activity        | Neoplasms                    | 52.82   | 3.75   |
| 2013 | Low physical activity        | Diabetes mellitus            | 50.80   | 0.81   |
| 2019 | Low physical activity        | Cardiovascular diseases      | 144.17  | 14.06  |
| 2019 | Low physical activity        | Neoplasms                    | 58.04   | 4.43   |

|      |                       |                              |        |       |
|------|-----------------------|------------------------------|--------|-------|
| 2019 | Low physical activity | Diabetes mellitus            | 64.42  | 0.93  |
| 2013 | Tobacco smoking       | Cardiovascular diseases      | 361.60 | 15.06 |
| 2013 | Tobacco smoking       | Neoplasms                    | 521.46 | 28.75 |
| 2013 | Tobacco smoking       | Other NCDs                   | 415.49 | 7.62  |
| 2013 | Tobacco smoking       | Chronic respiratory diseases | 136.08 | 5.16  |
| 2013 | Tobacco smoking       | Diabetes mellitus            | 55.36  | 0.50  |
| 2013 | Tobacco smoking       | Injurie                      | 12.15  | 0.13  |
| 2019 | Tobacco smoking       | Cardiovascular diseases      | 340.93 | 14.94 |
| 2019 | Tobacco smoking       | Neoplasms                    | 507.94 | 29.99 |
| 2019 | Tobacco smoking       | Other NCDs                   | 377.63 | 8.29  |
| 2019 | Tobacco smoking       | Chronic respiratory diseases | 138.56 | 5.60  |
| 2019 | Tobacco smoking       | Diabetes mellitus            | 66.14  | 0.53  |
| 2019 | Tobacco smoking       | Injurie                      | 12.81  | 0.13  |
| 2013 | Unsafe sex            | Neoplasms                    | 155.05 | 6.28  |
| 2019 | Unsafe sex            | Neoplasms                    | 148.74 | 6.43  |

\* Data, except for hepatitis B and C virus infections, *Helicobacter pylori* infection, HPV infection, and HTLV-1 infection, were obtained from the GBD results tool: <http://ghdx.healthdata.org/gbd-results-tool>. DALYs: disability-adjusted life years; NCDs: non-communicable diseases; LDL: low-density lipoprotein; HPV: human papillomavirus; HTLV-1: human T-cell leukemia virus type 1. The order of the risk factors is sorted alphabetically.

**Supplementary Table 6: All-age DALYs and number of deaths attributable to preventable behavioral and metabolic risk factors in 2013 and 2019 for men**

| Year | Risk factors                           | Cause                   | DALYs     | Number of deaths |
|------|----------------------------------------|-------------------------|-----------|------------------|
| 2013 | Alcohol use                            | Cardiovascular diseases | 63700.12  | 1699.26          |
| 2013 | Alcohol use                            | Neoplasms               | 268790.69 | 12682.94         |
| 2013 | Alcohol use                            | Other NCDs              | 326908.39 | 10581.95         |
| 2013 | Alcohol use                            | Diabetes mellitus       | 3153.03   | 8.04             |
| 2013 | Alcohol use                            | Injurie                 | 271511.62 | 6061.16          |
| 2019 | Alcohol use                            | Cardiovascular diseases | 70002.31  | 2078.16          |
| 2019 | Alcohol use                            | Neoplasms               | 264253.56 | 13218.62         |
| 2019 | Alcohol use                            | Other NCDs              | 312618.75 | 10516.32         |
| 2019 | Alcohol use                            | Diabetes mellitus       | 4429.45   | 11.99            |
| 2019 | Alcohol use                            | Injurie                 | 245454.50 | 5496.29          |
| 2013 | Child and maternal malnutrition        | Other NCDs              | 214.22    | 2.41             |
| 2019 | Child and maternal malnutrition        | Other NCDs              | 169.12    | 1.90             |
| 2013 | Childhood sexual abuse and bullying    | Other NCDs              | 25335.82  | 63.75            |
| 2019 | Childhood sexual abuse and bullying    | Other NCDs              | 24758.73  | 62.59            |
| 2013 | Diet high in processed meat            | Cardiovascular diseases | 60218.16  | 2588.32          |
| 2013 | Diet high in processed meat            | Neoplasms               | 33155.99  | 1498.50          |
| 2013 | Diet high in processed meat            | Diabetes mellitus       | 58868.98  | 464.09           |
| 2019 | Diet high in processed meat            | Cardiovascular diseases | 50202.43  | 2275.12          |
| 2019 | Diet high in processed meat            | Neoplasms               | 30690.57  | 1455.28          |
| 2019 | Diet high in processed meat            | Diabetes mellitus       | 62095.56  | 439.19           |
| 2013 | Diet high in red meat                  | Cardiovascular diseases | 98928.25  | 4244.76          |
| 2013 | Diet high in red meat                  | Neoplasms               | 16301.12  | 791.27           |
| 2013 | Diet high in red meat                  | Diabetes mellitus       | 21247.59  | 178.38           |
| 2019 | Diet high in red meat                  | Cardiovascular diseases | 97173.11  | 4474.90          |
| 2019 | Diet high in red meat                  | Neoplasms               | 16766.92  | 869.39           |
| 2019 | Diet high in red meat                  | Diabetes mellitus       | 24678.21  | 190.54           |
| 2013 | Diet high in sodium                    | Cardiovascular diseases | 314531.62 | 15454.09         |
| 2013 | Diet high in sodium                    | Neoplasms               | 55781.70  | 3086.28          |
| 2013 | Diet high in sodium                    | Chronic kidney disease  | 40327.21  | 1934.57          |
| 2019 | Diet high in sodium                    | Cardiovascular diseases | 300667.66 | 16067.21         |
| 2019 | Diet high in sodium                    | Neoplasms               | 50707.55  | 3034.29          |
| 2019 | Diet high in sodium                    | Chronic kidney disease  | 39005.58  | 2107.41          |
| 2013 | Diet high in sugar-sweetened beverages | Cardiovascular diseases | 23978.15  | 1357.32          |
| 2013 | Diet high in sugar-sweetened beverages | Diabetes mellitus       | 14305.43  | 126.88           |
| 2019 | Diet high in sugar-sweetened beverages | Cardiovascular diseases | 23983.50  | 1469.04          |
| 2019 | Diet high in sugar-sweetened beverages | Diabetes mellitus       | 17302.43  | 140.72           |
| 2013 | Diet high in trans fatty acids         | Cardiovascular diseases | 60582.08  | 3271.96          |
| 2019 | Diet high in trans fatty acids         | Cardiovascular diseases | 57859.25  | 3413.19          |
| 2013 | Diet low in calcium                    | Neoplasms               | 81551.26  | 4158.46          |
| 2019 | Diet low in calcium                    | Neoplasms               | 80146.58  | 4389.01          |
| 2013 | Diet low in fiber                      | Cardiovascular diseases | 94395.79  | 4378.25          |
| 2013 | Diet low in fiber                      | Neoplasms               | 11133.99  | 559.60           |
| 2013 | Diet low in fiber                      | Diabetes mellitus       | 12536.98  | 113.25           |

|      |                                         |                         |           |          |
|------|-----------------------------------------|-------------------------|-----------|----------|
| 2019 | Diet low in fiber                       | Cardiovascular diseases | 86320.36  | 4376.69  |
| 2019 | Diet low in fiber                       | Neoplasms               | 10731.77  | 583.40   |
| 2019 | Diet low in fiber                       | Diabetes mellitus       | 13701.23  | 115.11   |
| 2013 | Diet low in fruits                      | Cardiovascular diseases | 154375.75 | 6685.48  |
| 2013 | Diet low in fruits                      | Neoplasms               | 78597.97  | 4120.18  |
| 2013 | Diet low in fruits                      | Diabetes mellitus       | 30442.35  | 255.57   |
| 2019 | Diet low in fruits                      | Cardiovascular diseases | 142203.95 | 6620.10  |
| 2019 | Diet low in fruits                      | Neoplasms               | 70198.67  | 3926.59  |
| 2019 | Diet low in fruits                      | Diabetes mellitus       | 32288.14  | 247.72   |
| 2013 | Diet low in legumes                     | Cardiovascular diseases | 77300.90  | 3986.88  |
| 2019 | Diet low in legumes                     | Cardiovascular diseases | 68823.31  | 3960.73  |
| 2013 | Diet low in milk                        | Neoplasms               | 102143.55 | 5153.29  |
| 2019 | Diet low in milk                        | Neoplasms               | 103243.38 | 5582.83  |
| 2013 | Diet low in nuts and seeds              | Cardiovascular diseases | 102149.87 | 5677.37  |
| 2013 | Diet low in nuts and seeds              | Diabetes mellitus       | 11185.93  | 108.04   |
| 2019 | Diet low in nuts and seeds              | Cardiovascular diseases | 97060.55  | 5917.17  |
| 2019 | Diet low in nuts and seeds              | Diabetes mellitus       | 12645.78  | 113.75   |
| 2013 | Diet low in polyunsaturated fatty acids | Cardiovascular diseases | 31573.06  | 1665.90  |
| 2019 | Diet low in polyunsaturated fatty acids | Cardiovascular diseases | 29643.79  | 1705.70  |
| 2013 | Diet low in seafood omega-3 fatty acids | Cardiovascular diseases | 12906.09  | 1066.96  |
| 2019 | Diet low in seafood omega-3 fatty acids | Cardiovascular diseases | 30048.12  | 2170.80  |
| 2013 | Diet low in vegetables                  | Cardiovascular diseases | 25327.72  | 1297.31  |
| 2013 | Diet low in vegetables                  | Neoplasms               | 3501.92   | 180.75   |
| 2019 | Diet low in vegetables                  | Cardiovascular diseases | 24075.64  | 1378.56  |
| 2019 | Diet low in vegetables                  | Neoplasms               | 3379.06   | 187.73   |
| 2013 | Diet low in whole grains                | Cardiovascular diseases | 205195.92 | 10560.91 |
| 2013 | Diet low in whole grains                | Neoplasms               | 92137.35  | 4636.55  |
| 2013 | Diet low in whole grains                | Diabetes mellitus       | 20621.01  | 187.35   |
| 2019 | Diet low in whole grains                | Cardiovascular diseases | 195550.64 | 10956.18 |
| 2019 | Diet low in whole grains                | Neoplasms               | 93036.16  | 5016.62  |
| 2019 | Diet low in whole grains                | Diabetes mellitus       | 23254.13  | 195.77   |
| 2013 | Drug use                                | Neoplasms               | 69861.87  | 3290.17  |
| 2013 | Drug use                                | Other NCDs              | 136067.03 | 2520.87  |
| 2013 | Drug use                                | Injurie                 | 6997.46   | 142.66   |
| 2019 | Drug use                                | Neoplasms               | 72121.75  | 3599.32  |
| 2019 | Drug use                                | Other NCDs              | 132297.62 | 2541.16  |
| 2019 | Drug use                                | Injurie                 | 5908.68   | 122.01   |
| 2013 | HPV infection                           | Neoplasms               | NA        | 662.63   |
| 2019 | HPV infection                           | Neoplasms               | NA        | 818.70   |
| 2013 | HTLV-1 infection                        | Neoplasms               | NA        | 528.00   |
| 2019 | HTLV-1 infection                        | Neoplasms               | NA        | 489.00   |
| 2013 | <i>Helicobacter pylori</i> infection    | Neoplasms               | NA        | 30191.91 |
| 2019 | <i>Helicobacter pylori</i> infection    | Neoplasms               | NA        | 31790.48 |
| 2013 | Hepatitis B virus infection             | Neoplasms               | 55494.00  | 2467.75  |
| 2019 | Hepatitis B virus infection             | Neoplasms               | 51654.98  | 2407.27  |
| 2013 | Hepatitis C virus infection             | Neoplasms               | 269625.97 | 15145.71 |

|      |                              |                              |            |          |
|------|------------------------------|------------------------------|------------|----------|
| 2019 | Hepatitis C virus infection  | Neoplasms                    | 260854.47  | 15650.88 |
| 2013 | High LDL cholesterol         | Cardiovascular diseases      | 655602.19  | 33492.92 |
| 2019 | High LDL cholesterol         | Cardiovascular diseases      | 631235.06  | 35604.28 |
| 2013 | High body-mass index         | Cardiovascular diseases      | 286255.34  | 10749.48 |
| 2013 | High body-mass index         | Neoplasms                    | 125327.31  | 6211.20  |
| 2013 | High body-mass index         | Chronic kidney disease       | 62622.12   | 2458.52  |
| 2013 | High body-mass index         | Other NCDs                   | 103124.61  | 2635.19  |
| 2013 | High body-mass index         | Chronic respiratory diseases | 9258.00    | 94.80    |
| 2013 | High body-mass index         | Diabetes mellitus            | 116047.09  | 793.78   |
| 2019 | High body-mass index         | Cardiovascular diseases      | 273850.34  | 10813.48 |
| 2019 | High body-mass index         | Neoplasms                    | 124470.50  | 6569.80  |
| 2019 | High body-mass index         | Chronic kidney disease       | 59969.98   | 2627.82  |
| 2019 | High body-mass index         | Other NCDs                   | 111328.10  | 3374.51  |
| 2019 | High body-mass index         | Chronic respiratory diseases | 9257.14    | 97.16    |
| 2019 | High body-mass index         | Diabetes mellitus            | 130656.66  | 796.27   |
| 2013 | High fasting plasma glucose  | Cardiovascular diseases      | 414972.56  | 23310.86 |
| 2013 | High fasting plasma glucose  | Neoplasms                    | 146719.70  | 8573.69  |
| 2013 | High fasting plasma glucose  | Chronic kidney disease       | 166151.47  | 7656.77  |
| 2013 | High fasting plasma glucose  | Other NCDs                   | 47568.02   | 3201.72  |
| 2013 | High fasting plasma glucose  | Diabetes mellitus            | 460516.78  | 4157.82  |
| 2019 | High fasting plasma glucose  | Cardiovascular diseases      | 463280.16  | 27611.83 |
| 2019 | High fasting plasma glucose  | Neoplasms                    | 157831.97  | 9821.23  |
| 2019 | High fasting plasma glucose  | Chronic kidney disease       | 153738.03  | 7923.12  |
| 2019 | High fasting plasma glucose  | Other NCDs                   | 61790.84   | 4384.66  |
| 2019 | High fasting plasma glucose  | Diabetes mellitus            | 516539.47  | 4347.33  |
| 2013 | High systolic blood pressure | Cardiovascular diseases      | 1529577.12 | 76958.17 |
| 2013 | High systolic blood pressure | Chronic kidney disease       | 249841.53  | 12605.33 |
| 2019 | High systolic blood pressure | Cardiovascular diseases      | 1509737.27 | 81431.28 |
| 2019 | High systolic blood pressure | Chronic kidney disease       | 257607.06  | 14480.42 |
| 2013 | Intimate partner violence    | Other NCDs                   | 0.00       | 0.00     |
| 2013 | Intimate partner violence    | Injurie                      | 0.00       | 0.00     |
| 2019 | Intimate partner violence    | Other NCDs                   | 0.00       | 0.00     |
| 2019 | Intimate partner violence    | Injurie                      | 0.00       | 0.00     |
| 2013 | Kidney dysfunction           | Cardiovascular diseases      | 265645.00  | 15110.68 |
| 2013 | Kidney dysfunction           | Chronic kidney disease       | 408908.25  | 19376.14 |
| 2013 | Kidney dysfunction           | Other NCDs                   | 9144.09    | 0.00     |
| 2019 | Kidney dysfunction           | Cardiovascular diseases      | 276119.31  | 17071.19 |
| 2019 | Kidney dysfunction           | Chronic kidney disease       | 404564.91  | 21343.56 |
| 2019 | Kidney dysfunction           | Other NCDs                   | 10764.45   | 0.00     |
| 2013 | Low bone mineral density     | Injurie                      | 165297.06  | 3989.82  |
| 2019 | Low bone mineral density     | Injurie                      | 185757.64  | 4595.22  |
| 2013 | Low physical activity        | Cardiovascular diseases      | 72302.50   | 4822.24  |
| 2013 | Low physical activity        | Neoplasms                    | 29109.94   | 1751.81  |
| 2013 | Low physical activity        | Diabetes mellitus            | 33880.21   | 380.85   |
| 2019 | Low physical activity        | Cardiovascular diseases      | 74974.64   | 5406.39  |
| 2019 | Low physical activity        | Neoplasms                    | 31087.91   | 1994.13  |



|      |                       |                              |            |          |
|------|-----------------------|------------------------------|------------|----------|
| 2019 | Low physical activity | Diabetes mellitus            | 39369.64   | 416.69   |
| 2013 | Tobacco smoking       | Cardiovascular diseases      | 850292.94  | 35045.30 |
| 2013 | Tobacco smoking       | Neoplasms                    | 1689700.37 | 91627.79 |
| 2013 | Tobacco smoking       | Other NCDs                   | 507170.05  | 11812.18 |
| 2013 | Tobacco smoking       | Chronic respiratory diseases | 376513.94  | 15126.28 |
| 2013 | Tobacco smoking       | Diabetes mellitus            | 101551.32  | 782.83   |
| 2013 | Tobacco smoking       | Injurie                      | 21117.97   | 455.89   |
| 2019 | Tobacco smoking       | Cardiovascular diseases      | 726817.50  | 30861.47 |
| 2019 | Tobacco smoking       | Neoplasms                    | 1513789.52 | 87373.25 |
| 2019 | Tobacco smoking       | Other NCDs                   | 451702.54  | 12719.16 |
| 2019 | Tobacco smoking       | Chronic respiratory diseases | 372226.25  | 16161.80 |
| 2019 | Tobacco smoking       | Diabetes mellitus            | 103605.60  | 719.46   |
| 2019 | Tobacco smoking       | Injurie                      | 19852.30   | 424.75   |
| 2013 | Unsafe sex            | Neoplasms                    | 0.00       | 0.00     |
| 2019 | Unsafe sex            | Neoplasms                    | 0.00       | 0.00     |

\* Data, except for hepatitis B and C virus infections, *Helicobacter pylori* infection, HPV infection, and HTLV-1 infection, were obtained from the GBD results tool: <http://ghdx.healthdata.org/gbd-results-tool>. DALYs: disability-adjusted life years; NCDs: non-communicable diseases; LDL: low-density lipoprotein; HPV: human papillomavirus; HTLV-1: human T-cell leukemia virus type 1. The order of the risk factors is sorted alphabetically.

**Supplementary Table 7: All-age DALYs rate (per 100,000) and mortality rate (per 100,000) attributable to preventable behavioral and metabolic risk factors in 2013 and 2019 for men**

| Year | Risk factors                           | Cause                   | DALYs rate | Mortality rate |
|------|----------------------------------------|-------------------------|------------|----------------|
| 2013 | Alcohol use                            | Cardiovascular diseases | 100.78     | 2.69           |
| 2013 | Alcohol use                            | Neoplasms               | 425.27     | 20.07          |
| 2013 | Alcohol use                            | Other NCDs              | 517.22     | 16.74          |
| 2013 | Alcohol use                            | Diabetes mellitus       | 4.99       | 0.01           |
| 2013 | Alcohol use                            | Injurie                 | 429.58     | 9.59           |
| 2019 | Alcohol use                            | Cardiovascular diseases | 112.42     | 3.34           |
| 2019 | Alcohol use                            | Neoplasms               | 424.36     | 21.23          |
| 2019 | Alcohol use                            | Other NCDs              | 502.03     | 16.89          |
| 2019 | Alcohol use                            | Diabetes mellitus       | 7.11       | 0.02           |
| 2019 | Alcohol use                            | Injurie                 | 394.17     | 8.83           |
| 2013 | Child and maternal malnutrition        | Other NCDs              | 0.34       | 0.00           |
| 2019 | Child and maternal malnutrition        | Other NCDs              | 0.27       | 0.00           |
| 2013 | Childhood sexual abuse and bullying    | Other NCDs              | 40.09      | 0.10           |
| 2019 | Childhood sexual abuse and bullying    | Other NCDs              | 39.76      | 0.10           |
| 2013 | Diet high in processed meat            | Cardiovascular diseases | 95.27      | 4.10           |
| 2013 | Diet high in processed meat            | Neoplasms               | 52.46      | 2.37           |
| 2013 | Diet high in processed meat            | Diabetes mellitus       | 93.14      | 0.73           |
| 2019 | Diet high in processed meat            | Cardiovascular diseases | 80.62      | 3.65           |
| 2019 | Diet high in processed meat            | Neoplasms               | 49.29      | 2.34           |
| 2019 | Diet high in processed meat            | Diabetes mellitus       | 99.72      | 0.71           |
| 2013 | Diet high in red meat                  | Cardiovascular diseases | 156.52     | 6.72           |
| 2013 | Diet high in red meat                  | Neoplasms               | 25.79      | 1.25           |
| 2013 | Diet high in red meat                  | Diabetes mellitus       | 33.62      | 0.28           |
| 2019 | Diet high in red meat                  | Cardiovascular diseases | 156.05     | 7.19           |
| 2019 | Diet high in red meat                  | Neoplasms               | 26.93      | 1.40           |
| 2019 | Diet high in red meat                  | Diabetes mellitus       | 39.63      | 0.31           |
| 2013 | Diet high in sodium                    | Cardiovascular diseases | 497.64     | 24.45          |
| 2013 | Diet high in sodium                    | Neoplasms               | 88.26      | 4.88           |
| 2013 | Diet high in sodium                    | Chronic kidney disease  | 63.80      | 3.06           |
| 2019 | Diet high in sodium                    | Cardiovascular diseases | 482.84     | 25.80          |
| 2019 | Diet high in sodium                    | Neoplasms               | 81.43      | 4.87           |
| 2019 | Diet high in sodium                    | Chronic kidney disease  | 62.64      | 3.38           |
| 2013 | Diet high in sugar-sweetened beverages | Cardiovascular diseases | 37.94      | 2.15           |
| 2013 | Diet high in sugar-sweetened beverages | Diabetes mellitus       | 22.63      | 0.20           |
| 2019 | Diet high in sugar-sweetened beverages | Cardiovascular diseases | 38.52      | 2.36           |
| 2019 | Diet high in sugar-sweetened beverages | Diabetes mellitus       | 27.79      | 0.23           |
| 2013 | Diet high in trans fatty acids         | Cardiovascular diseases | 95.85      | 5.18           |
| 2019 | Diet high in trans fatty acids         | Cardiovascular diseases | 92.92      | 5.48           |
| 2013 | Diet low in calcium                    | Neoplasms               | 129.03     | 6.58           |
| 2019 | Diet low in calcium                    | Neoplasms               | 128.71     | 7.05           |
| 2013 | Diet low in fiber                      | Cardiovascular diseases | 149.35     | 6.93           |
| 2013 | Diet low in fiber                      | Neoplasms               | 17.62      | 0.89           |
| 2013 | Diet low in fiber                      | Diabetes mellitus       | 19.84      | 0.18           |

|      |                                         |                         |        |       |
|------|-----------------------------------------|-------------------------|--------|-------|
| 2019 | Diet low in fiber                       | Cardiovascular diseases | 138.62 | 7.03  |
| 2019 | Diet low in fiber                       | Neoplasms               | 17.23  | 0.94  |
| 2019 | Diet low in fiber                       | Diabetes mellitus       | 22.00  | 0.18  |
| 2013 | Diet low in fruits                      | Cardiovascular diseases | 244.25 | 10.58 |
| 2013 | Diet low in fruits                      | Neoplasms               | 124.35 | 6.52  |
| 2013 | Diet low in fruits                      | Diabetes mellitus       | 48.16  | 0.40  |
| 2019 | Diet low in fruits                      | Cardiovascular diseases | 228.36 | 10.63 |
| 2019 | Diet low in fruits                      | Neoplasms               | 112.73 | 6.31  |
| 2019 | Diet low in fruits                      | Diabetes mellitus       | 51.85  | 0.40  |
| 2013 | Diet low in legumes                     | Cardiovascular diseases | 122.30 | 6.31  |
| 2019 | Diet low in legumes                     | Cardiovascular diseases | 110.52 | 6.36  |
| 2013 | Diet low in milk                        | Neoplasms               | 161.61 | 8.15  |
| 2019 | Diet low in milk                        | Neoplasms               | 165.80 | 8.97  |
| 2013 | Diet low in nuts and seeds              | Cardiovascular diseases | 161.62 | 8.98  |
| 2013 | Diet low in nuts and seeds              | Diabetes mellitus       | 17.70  | 0.17  |
| 2019 | Diet low in nuts and seeds              | Cardiovascular diseases | 155.87 | 9.50  |
| 2019 | Diet low in nuts and seeds              | Diabetes mellitus       | 20.31  | 0.18  |
| 2013 | Diet low in polyunsaturated fatty acids | Cardiovascular diseases | 49.95  | 2.64  |
| 2019 | Diet low in polyunsaturated fatty acids | Cardiovascular diseases | 47.60  | 2.74  |
| 2013 | Diet low in seafood omega-3 fatty acids | Cardiovascular diseases | 20.42  | 1.69  |
| 2019 | Diet low in seafood omega-3 fatty acids | Cardiovascular diseases | 48.25  | 3.49  |
| 2013 | Diet low in vegetables                  | Cardiovascular diseases | 40.07  | 2.05  |
| 2013 | Diet low in vegetables                  | Neoplasms               | 5.54   | 0.29  |
| 2019 | Diet low in vegetables                  | Cardiovascular diseases | 38.66  | 2.21  |
| 2019 | Diet low in vegetables                  | Neoplasms               | 5.43   | 0.30  |
| 2013 | Diet low in whole grains                | Cardiovascular diseases | 324.65 | 16.71 |
| 2013 | Diet low in whole grains                | Neoplasms               | 145.78 | 7.34  |
| 2013 | Diet low in whole grains                | Diabetes mellitus       | 32.63  | 0.30  |
| 2019 | Diet low in whole grains                | Cardiovascular diseases | 314.03 | 17.59 |
| 2019 | Diet low in whole grains                | Neoplasms               | 149.41 | 8.06  |
| 2019 | Diet low in whole grains                | Diabetes mellitus       | 37.34  | 0.31  |
| 2013 | Drug use                                | Neoplasms               | 110.53 | 5.21  |
| 2013 | Drug use                                | Other NCDs              | 215.28 | 3.99  |
| 2013 | Drug use                                | Injurie                 | 11.07  | 0.23  |
| 2019 | Drug use                                | Neoplasms               | 115.82 | 5.78  |
| 2019 | Drug use                                | Other NCDs              | 212.46 | 4.08  |
| 2019 | Drug use                                | Injurie                 | 9.49   | 0.20  |
| 2013 | HPV infection                           | Neoplasms               | NA     | 1.05  |
| 2019 | HPV infection                           | Neoplasms               | NA     | 1.31  |
| 2013 | HTLV-1 infection                        | Neoplasms               | NA     | 0.84  |
| 2019 | HTLV-1 infection                        | Neoplasms               | NA     | 0.79  |
| 2013 | <i>Helicobacter pylori</i> infection    | Neoplasms               | NA     | 47.77 |
| 2019 | <i>Helicobacter pylori</i> infection    | Neoplasms               | NA     | 51.05 |
| 2013 | Hepatitis B virus infection             | Neoplasms               | 87.80  | 3.90  |
| 2019 | Hepatitis B virus infection             | Neoplasms               | 82.95  | 3.87  |
| 2013 | Hepatitis C virus infection             | Neoplasms               | 426.59 | 23.96 |

|      |                              |                              |         |        |
|------|------------------------------|------------------------------|---------|--------|
| 2019 | Hepatitis C virus infection  | Neoplasms                    | 418.91  | 25.13  |
| 2013 | High LDL cholesterol         | Cardiovascular diseases      | 1037.27 | 52.99  |
| 2019 | High LDL cholesterol         | Cardiovascular diseases      | 1013.70 | 57.18  |
| 2013 | High body-mass index         | Cardiovascular diseases      | 452.90  | 17.01  |
| 2013 | High body-mass index         | Neoplasms                    | 198.29  | 9.83   |
| 2013 | High body-mass index         | Chronic kidney disease       | 99.08   | 3.89   |
| 2013 | High body-mass index         | Other NCDs                   | 163.16  | 4.17   |
| 2013 | High body-mass index         | Chronic respiratory diseases | 14.65   | 0.15   |
| 2013 | High body-mass index         | Diabetes mellitus            | 183.61  | 1.26   |
| 2019 | High body-mass index         | Cardiovascular diseases      | 439.78  | 17.37  |
| 2019 | High body-mass index         | Neoplasms                    | 199.89  | 10.55  |
| 2019 | High body-mass index         | Chronic kidney disease       | 96.31   | 4.22   |
| 2019 | High body-mass index         | Other NCDs                   | 178.78  | 5.42   |
| 2019 | High body-mass index         | Chronic respiratory diseases | 14.87   | 0.16   |
| 2019 | High body-mass index         | Diabetes mellitus            | 209.82  | 1.28   |
| 2013 | High fasting plasma glucose  | Cardiovascular diseases      | 656.55  | 36.88  |
| 2013 | High fasting plasma glucose  | Neoplasms                    | 232.13  | 13.56  |
| 2013 | High fasting plasma glucose  | Chronic kidney disease       | 262.88  | 12.11  |
| 2013 | High fasting plasma glucose  | Other NCDs                   | 75.26   | 5.07   |
| 2013 | High fasting plasma glucose  | Diabetes mellitus            | 728.61  | 6.58   |
| 2019 | High fasting plasma glucose  | Cardiovascular diseases      | 743.98  | 44.34  |
| 2019 | High fasting plasma glucose  | Neoplasms                    | 253.46  | 15.77  |
| 2019 | High fasting plasma glucose  | Chronic kidney disease       | 246.89  | 12.72  |
| 2019 | High fasting plasma glucose  | Other NCDs                   | 99.23   | 7.04   |
| 2019 | High fasting plasma glucose  | Diabetes mellitus            | 829.51  | 6.98   |
| 2013 | High systolic blood pressure | Cardiovascular diseases      | 2420.04 | 121.76 |
| 2013 | High systolic blood pressure | Chronic kidney disease       | 395.29  | 19.94  |
| 2019 | High systolic blood pressure | Cardiovascular diseases      | 2424.48 | 130.77 |
| 2019 | High systolic blood pressure | Chronic kidney disease       | 413.69  | 23.25  |
| 2013 | Intimate partner violence    | Other NCDs                   | 0.00    | 0.00   |
| 2013 | Intimate partner violence    | Injurie                      | 0.00    | 0.00   |
| 2019 | Intimate partner violence    | Other NCDs                   | 0.00    | 0.00   |
| 2019 | Intimate partner violence    | Injurie                      | 0.00    | 0.00   |
| 2013 | Kidney dysfunction           | Cardiovascular diseases      | 420.29  | 23.91  |
| 2013 | Kidney dysfunction           | Chronic kidney disease       | 646.96  | 30.66  |
| 2013 | Kidney dysfunction           | Other NCDs                   | 14.47   | 0.00   |
| 2019 | Kidney dysfunction           | Cardiovascular diseases      | 443.42  | 27.41  |
| 2019 | Kidney dysfunction           | Chronic kidney disease       | 649.69  | 34.28  |
| 2019 | Kidney dysfunction           | Other NCDs                   | 17.29   | 0.00   |
| 2013 | Low bone mineral density     | Injurie                      | 261.53  | 6.31   |
| 2019 | Low bone mineral density     | Injurie                      | 298.31  | 7.38   |
| 2013 | Low physical activity        | Cardiovascular diseases      | 114.39  | 7.63   |
| 2013 | Low physical activity        | Neoplasms                    | 46.06   | 2.77   |
| 2013 | Low physical activity        | Diabetes mellitus            | 53.60   | 0.60   |
| 2019 | Low physical activity        | Cardiovascular diseases      | 120.40  | 8.68   |
| 2019 | Low physical activity        | Neoplasms                    | 49.92   | 3.20   |

|      |                       |                              |         |        |
|------|-----------------------|------------------------------|---------|--------|
| 2019 | Low physical activity | Diabetes mellitus            | 63.22   | 0.67   |
| 2013 | Tobacco smoking       | Cardiovascular diseases      | 1345.30 | 55.45  |
| 2013 | Tobacco smoking       | Neoplasms                    | 2673.38 | 144.97 |
| 2013 | Tobacco smoking       | Other NCDs                   | 802.43  | 18.69  |
| 2013 | Tobacco smoking       | Chronic respiratory diseases | 595.71  | 23.93  |
| 2013 | Tobacco smoking       | Diabetes mellitus            | 160.67  | 1.24   |
| 2013 | Tobacco smoking       | Injurie                      | 33.41   | 0.72   |
| 2019 | Tobacco smoking       | Cardiovascular diseases      | 1167.19 | 49.56  |
| 2019 | Tobacco smoking       | Neoplasms                    | 2430.99 | 140.31 |
| 2019 | Tobacco smoking       | Other NCDs                   | 725.39  | 20.43  |
| 2019 | Tobacco smoking       | Chronic respiratory diseases | 597.76  | 25.95  |
| 2019 | Tobacco smoking       | Diabetes mellitus            | 166.38  | 1.16   |
| 2019 | Tobacco smoking       | Injurie                      | 31.88   | 0.68   |
| 2013 | Unsafe sex            | Neoplasms                    | 0.00    | 0.00   |
| 2019 | Unsafe sex            | Neoplasms                    | 0.00    | 0.00   |

\* Data, except for hepatitis B and C virus infections, *Helicobacter pylori* infection, HPV infection, and HTLV-1 infection, were obtained from the GBD results tool: <http://ghdx.healthdata.org/gbd-results-tool>. DALYs: disability-adjusted life years; NCDs: non-communicable diseases; LDL: low-density lipoprotein; HPV: human papillomavirus; HTLV-1: human T-cell leukemia virus type 1. The order of the risk factors is sorted alphabetically.

**Supplementary Table 8: Goals of Health Japan 21 (the second term) for prevention of onset and progression of non-communicable diseases**

| Target                                                                                                                                                                     | Goal                                                                                                                                | Interim evaluation in 2018 |
|----------------------------------------------------------------------------------------------------------------------------------------------------------------------------|-------------------------------------------------------------------------------------------------------------------------------------|----------------------------|
| <b>Cancer</b>                                                                                                                                                              |                                                                                                                                     |                            |
| <ul style="list-style-type: none"> <li>Reduction in age-adjusted mortality rate of cancer under age 75 (per 100,000)</li> </ul>                                            | 73.9                                                                                                                                | A*                         |
| <ul style="list-style-type: none"> <li>Increase in rate of participation in cancer screenings</li> </ul>                                                                   | 50% (40% for gastric, lung, and colorectal cancer)                                                                                  | A*                         |
| <b>Cardiovascular disease</b>                                                                                                                                              |                                                                                                                                     |                            |
| <ul style="list-style-type: none"> <li>Reduction in age-adjusted mortality rate of cerebrovascular disease (CVD) and ischemic heart disease (IHD) (per 100,000)</li> </ul> | CVD: Male 41.6, Female 24.7; IHD: Male 31.8, Female 13.7                                                                            | A                          |
| <ul style="list-style-type: none"> <li>Improvement of hypertension (reduction in average systolic blood pressure)</li> </ul>                                               | Male 134 mmHg, Female 129 mmHg                                                                                                      | A                          |
| <ul style="list-style-type: none"> <li>Reduction in percentage of adults with dyslipidemia</li> </ul>                                                                      | Those with total cholesterol over 240mg/dl: Male 10%, Female 17%; Those with LDL cholesterol over 160 mg/dl: Male 6.2%, Female 8.8% | B                          |
| <ul style="list-style-type: none"> <li>Reduction in number of definite and at-risk people with metabolic syndrome</li> </ul>                                               | 25% less than 2008                                                                                                                  | B                          |
| <ul style="list-style-type: none"> <li>Increase in participation rates of specified health check-ups and specified health guidance</li> </ul>                              | Specified health check-ups: 70%, Specified health guidance: 45%                                                                     | A*                         |
| <b>Diabetes</b>                                                                                                                                                            |                                                                                                                                     |                            |
| <ul style="list-style-type: none"> <li>Reduction in complications (number of patients newly introduced to dialysis due to diabetic nephropathy)</li> </ul>                 | 15,000                                                                                                                              | B                          |
| <ul style="list-style-type: none"> <li>Increase in percentage of patients who continue treatment</li> </ul>                                                                | 75%                                                                                                                                 | B                          |
| <ul style="list-style-type: none"> <li>Decrease in percentage of individuals with elevated blood glucose levels (HbA1c (NGSP) <math>\geq 8.4\%</math>)</li> </ul>          | 1.0%                                                                                                                                | A                          |
| <ul style="list-style-type: none"> <li>Prevent increase in number of diabetic persons</li> </ul>                                                                           | 10,000,000                                                                                                                          | B                          |
| <ul style="list-style-type: none"> <li>Reduction in number of definite and at-risk people with metabolic syndrome</li> </ul>                                               | 25 less than 2008                                                                                                                   | B                          |
| <ul style="list-style-type: none"> <li>Increase in participation rates of specified health check-ups and health guidance</li> </ul>                                        | Specified health check-ups: 70%, Specified health guidance: 45%                                                                     | A*                         |
| <b>COPD</b>                                                                                                                                                                |                                                                                                                                     |                            |
| <ul style="list-style-type: none"> <li>Increase recognition of COPD</li> </ul>                                                                                             | 80%                                                                                                                                 | B                          |

A: Improving; A\*: Improving, but if the current trend continues, it is unlikely that the goal will be reached by the final evaluation; B: No change. Data were adapted from the interim evaluation report of the Health Japan 21 progress in 2018 (Ministry of Health, Labour and Welfare. Report on the interim evaluation of Health Japan 21 (2nd term) [Japanese]. 2018.

<https://www.mhlw.go.jp/content/000378318.pdf> (accessed December 14, 2021)).

**Supplementary Table 9: Goals of Health Japan 21 (the second term) for improvement of lifestyle**

| Target                                                                                                                                                                                                                                                                                                                                                                                                                                              | Goal                                                                                                                | Interim evaluation in 2018 |
|-----------------------------------------------------------------------------------------------------------------------------------------------------------------------------------------------------------------------------------------------------------------------------------------------------------------------------------------------------------------------------------------------------------------------------------------------------|---------------------------------------------------------------------------------------------------------------------|----------------------------|
| <b>Nutrition and dietary habits</b>                                                                                                                                                                                                                                                                                                                                                                                                                 |                                                                                                                     |                            |
| <ul style="list-style-type: none"> <li>• Increase in percentage of individuals maintaining ideal body weight (Reduction in percentage of obese individuals [BMI 25 and more] and underweight individuals [BMI less than 18.5])</li> </ul>                                                                                                                                                                                                           | Obese males in their 20s to 60s: 28%; Obese females in their 40s to 60s: 19%; Underweight females in their 20s: 20% | B                          |
| <ul style="list-style-type: none"> <li>• Increase in percentage of individuals who consume appropriate quality and quantity of food               <ul style="list-style-type: none"> <li>○ Increase in percentage of individuals who eat a balanced diet with staple food, main dish and side dish more than twice a day</li> <li>○ Decrease in mean salt intake</li> <li>○ Increase in consumption of vegetables and fruits</li> </ul> </li> </ul> | 80%<br>8g<br>Mean daily intake of vegetables: 350g; Individuals who consume fruit less than 100g per day: 30%       | B                          |
| <ul style="list-style-type: none"> <li>• Increase in dining with family regularly (decrease in percentage of children who eat alone)</li> </ul>                                                                                                                                                                                                                                                                                                     | To decrease                                                                                                         | B                          |
| <ul style="list-style-type: none"> <li>• Increase in number of corporations in food industry that supply food product low in salt and fat</li> </ul>                                                                                                                                                                                                                                                                                                | Registered corporations: 100; Registered restaurants 30,000 locations                                               | A                          |
| <ul style="list-style-type: none"> <li>• Increase in percentage of specific foodservice facilities that plan, cook, and evaluate and improve nutritional content of menu based on the needs of clients</li> </ul>                                                                                                                                                                                                                                   | 80%                                                                                                                 | A*                         |
| <b>Physical activity and exercise</b>                                                                                                                                                                                                                                                                                                                                                                                                               |                                                                                                                     |                            |
| <ul style="list-style-type: none"> <li>• Increase in daily number of steps</li> </ul>                                                                                                                                                                                                                                                                                                                                                               | 20–64 years old Male 9,000 steps, Female 8,500 steps; Over 65 years old Male 7,000 steps, Female 6,000 steps        | B                          |
| <ul style="list-style-type: none"> <li>• Increase in percentage of individuals who regularly exercise</li> </ul>                                                                                                                                                                                                                                                                                                                                    | 20-64 years old Male 36%, Female 33%; Over 65 years old Male 58% Female 48%                                         | B                          |
| <ul style="list-style-type: none"> <li>• Increase in number of local governments that offer community development and environment to promote physical activity</li> </ul>                                                                                                                                                                                                                                                                           | 47 prefectures                                                                                                      | A                          |
| <b>Rest</b>                                                                                                                                                                                                                                                                                                                                                                                                                                         |                                                                                                                     |                            |
| <ul style="list-style-type: none"> <li>• Reduction in percentage of individuals who do not take rest through sufficient sleep</li> </ul>                                                                                                                                                                                                                                                                                                            | 15%                                                                                                                 | B                          |
| <ul style="list-style-type: none"> <li>• Reduction in percentage of employees who work 60 hours or more per week</li> </ul>                                                                                                                                                                                                                                                                                                                         | 5.0%                                                                                                                | A*                         |
| <b>Alcohol drinking</b>                                                                                                                                                                                                                                                                                                                                                                                                                             |                                                                                                                     |                            |
| <ul style="list-style-type: none"> <li>• Reduction in percentage of individuals who consume alcohol over recommended limits (male &gt; 40 g, female &gt; 20 g per day)</li> </ul>                                                                                                                                                                                                                                                                   | Male 13%, Female 6.4%                                                                                               | B                          |
| <ul style="list-style-type: none"> <li>• Eradication of underage drinking</li> </ul>                                                                                                                                                                                                                                                                                                                                                                | 0%                                                                                                                  | A                          |
| <ul style="list-style-type: none"> <li>• Eradication of alcohol consumption among pregnant women</li> </ul>                                                                                                                                                                                                                                                                                                                                         | 0%                                                                                                                  | A*                         |
| <b>Tobacco smoking</b>                                                                                                                                                                                                                                                                                                                                                                                                                              |                                                                                                                     |                            |
| <ul style="list-style-type: none"> <li>• Reduction in percentage of adult smoking rate</li> </ul>                                                                                                                                                                                                                                                                                                                                                   | 12%                                                                                                                 | A*                         |

|                                                                                                                                                                  |                                                                                               |    |
|------------------------------------------------------------------------------------------------------------------------------------------------------------------|-----------------------------------------------------------------------------------------------|----|
| • Eradication of underage smoking                                                                                                                                | 0%                                                                                            | A  |
| • Eradication of smoking during pregnancy                                                                                                                        | 0%                                                                                            | A* |
| • Reduction in percentage of individuals who are exposed to passive smoking at home, workplace, restaurants, governmental institutions, and medical institutions | Governmental institutions 0%; Medical institutions 0%; Workplace 0%; Home 3%; Restaurants 15% | A* |
| Dental and oral health                                                                                                                                           |                                                                                               |    |
| • Maintenance and improvement of oral function (increase in percentage of individuals in their 60s with good mastication)                                        | 80%                                                                                           | B  |
| • Prevention of tooth loss                                                                                                                                       |                                                                                               | A  |
| ○ Increase in percentage of 80-year-old individuals with over 20 teeth remaining                                                                                 | 50%                                                                                           |    |
| ○ Increase in percentage of 60-year-old individuals with over 24 teeth remaining                                                                                 | 70%                                                                                           |    |
| ○ Increase in percentage of 40-year-old individuals with all teeth remaining                                                                                     | 75%                                                                                           |    |
| • Decrease in percentage of individuals with periodontal disease                                                                                                 |                                                                                               | C  |
| ○ Decrease in percentage of individuals in 20s with gingivitis                                                                                                   | 25%                                                                                           |    |
| ○ Decrease in percentage of individuals in 40s with progressive periodontitis                                                                                    | 25%                                                                                           |    |
| ○ Decrease in percentage of individuals in 60s with progressive periodontitis                                                                                    | 45%                                                                                           |    |
| • Increase in number of children without dental caries                                                                                                           |                                                                                               | A  |
| ○ Increase in number of prefectures where over 80% of 3-year-old children have no dental caries                                                                  | 23 prefectures                                                                                |    |
| ○ Increase in number of prefectures where 12-year-old children have less than 1 mean decayed, missing, and filled teeth (dmft)                                   | 28 prefectures                                                                                |    |
| • Increase in percentage of individuals who participated in dental check-up                                                                                      | 28 prefectures                                                                                | A  |

A: Improving; A\*: Improving, but if the current trend continues, it is unlikely that the goal will be reached by the final evaluation; B: No change. Data were adapted from the interim evaluation report of the Health Japan 21 progress in 2018 (Ministry of Health, Labour and Welfare. Report on the interim evaluation of Health Japan 21 (2nd term) [Japanese]. 2018. <https://www.mhlw.go.jp/content/000378318.pdf> (accessed December 14, 2021)).
